# Supplementary material for: The quality of websites addressing fibromyalgia: an assessment of quality and readability using standardised tools
Source: PubMed Central journal article supplement — BMJ Open. 2011 Jul 31;1(1):e000152. doi: 10.1136/bmjopen-2011-000152 (PMC3191440; doi:10.1136/bmjopen-2011-000152), 2011-07-31
Supplement: bmjopen-2011-000152.draft_revisions.pdf [file bmjopen-2011-000152.draft_revisions.pdf]

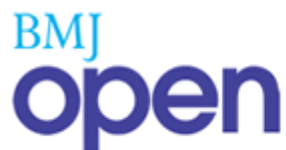

**A review of content, quality and readability of websites addressing fibromyalgia.**

|                               |                                                                                                                                                                                                                                                                                                                                                    |
|-------------------------------|----------------------------------------------------------------------------------------------------------------------------------------------------------------------------------------------------------------------------------------------------------------------------------------------------------------------------------------------------|
| Journal:                      | <i>BMJ Open</i>                                                                                                                                                                                                                                                                                                                                    |
| Manuscript ID:                | bmjopen-2011-000152                                                                                                                                                                                                                                                                                                                                |
| Article Type:                 | Research                                                                                                                                                                                                                                                                                                                                           |
| Date Submitted by the Author: | 04-May-2011                                                                                                                                                                                                                                                                                                                                        |
| Complete List of Authors:     | Daraz, Lubna; McMaster University, School of Rehabilitation Science<br>MacDermid, Joy; McMaster University, School of Rehabilitation Science<br>Wilkins, Seanne; McMaster University, School of Rehabilitation Science<br>Gibson, Jane; Institute for Work and Health<br>Shaw, Lynn; University of Western Ontario, School of Occupational Therapy |
| <b>Subject Heading</b>:       | Health informatics                                                                                                                                                                                                                                                                                                                                 |
| Keywords:                     | Health informatics < BIOTECHNOLOGY & BIOINFORMATICS, Information technology < BIOTECHNOLOGY & BIOINFORMATICS, Pain management < ANAESTHETICS, Health policy < HEALTH SERVICES ADMINISTRATION & MANAGEMENT, MEDICAL EDUCATION & TRAINING                                                                                                            |
|                               |                                                                                                                                                                                                                                                                                                                                                    |

SCHOLARONE™  
Manuscripts

only

**Article title:**

A review of content, quality and readability of websites addressing fibromyalgia.

**Authors:**

Lubna Daraz, BA, MSt, PhD  
School of Rehabilitation Science  
Faculty of Health Sciences, McMaster University  
1400 Main St. West. IAHS – 403. Hamilton, ON. L8S4L8

Joy C MacDermid, PhD  
Professor  
School of Rehabilitation Science  
Faculty of Health Sciences, McMaster University  
1400 Main St. West. IAHS – 429. Hamilton, ON. L8S4L8

Seanne Wilkins, PhD  
Associate Professor  
School of Rehabilitation Science  
Faculty of Health Sciences, McMaster University  
1400 Main St. West. IAHS – 446. Hamilton, ON. L8S4L8

Jane Gibson, MCISc (Speech Pathology)  
Director, Knowledge Translation  
Institute for Work & Health  
800- 481 University Avenue  
Toronto, Ontario M5G 2E9

Lynn Shaw, PhD  
Assistant Professor  
Faculty of health sciences, School of Occupational therapy  
University of Western Ontario  
1151 Richmond Street, London, Ontario, Canada, N6A 3K7

**Corresponding Author and name and address of the author to who requests for reprints should be addressed**

Lubna Daraz, PhD  
School of Rehabilitation Science  
Faculty of Health Sciences, McMaster University  
1400 Main St. West. IAHS – 403. Hamilton, ON. L8S4L8  
Phone: 905-916-0304  
Email: [darazl@mcmaster.ca](mailto:darazl@mcmaster.ca)

**Word counts:** 3296

**Contributorship statement:**

The first author, Dr. Daraz was in charge of all aspects of the research including choosing the topic, formulating research questions, reviewing literature, designing study, searching on Google, collecting data, evaluating websites and writing the manuscripts. Dr. MacDermid was involved in designing study, evaluating websites and reviewing manuscript. Dr. Wilkins and Ms. Gibson were involved in evaluating websites and reviewing manuscript. Dr. Shaw was involved in reviewing the manuscript.

## Abstract

### Background

People living with fibromyalgia strongly prefer to access health information from the Web. However, the majority of the people in previous studies strongly expressed their concerns about the quality of online information resources.

### Objectives

The purpose of this review was to evaluate existing online fibromyalgia information resources for content, quality and readability.

### Methods

The first 25 websites were identified using 'Google' and search keyword 'fibromyalgia'. Pairs of raters made independent evaluations of website quality using two structured tools (DISCERN, and a Quality Checklist). Readability was assessed using the Flesch Reading Ease score maps.

### Results

Ranking of the websites' quality varied by the tools used, although there was general agreement about the "top" three websites (Fibromyalgia Information, Fibromyalgia Information Foundation and National Institute of Arthritis and Musculoskeletal and Skin Diseases). Content analysis indicated that 72% websites provided information on treatment options, 68% on symptoms, 60% on diagnosis and 40% on coping and resources. DISCERN ratings classified 32% websites as 'very good', 32% as 'good' and 36% as 'marginal'. The mean overall DISCERN score was 36.88 (good). Only 16 % of websites met the recommended grade of 6 to 8 literacy level (Range 7 – 15).

### Conclusion

Higher quality websites tended to be less readable. Online fibromyalgia information resources do not provide comprehensive information about fibromyalgia; have low quality and poor readability. While information is critical to living with fibromyalgia, current resources are unlikely to provide necessary or accurate information; and may not be usable for people.

### Article Summary

#### Article focus

- The purpose of the study was to gain a better understanding of the online information resources that are available for people living with fibromyalgia and to evaluate those information resources for content, quality and readability.

- What are the content, website quality and readability of the most readily retrieved information available on the web when searching for fibromyalgia information?

#### Key messages

- Majority of the existing websites do not provide comprehensive information on fibromyalgia
- Websites are highly variable in terms of quality
- Higher quality websites do not present information in language/reading levels appropriate for the general population

#### Strengths and limitations of this study

- The search for online fibromyalgia information sources was not comprehensive due to the use of 'Google' and one keyword exclusively.
- There is no gold standard for comparison or ways to evaluate the quality of websites.
- The quality issue was discussed using the lens of critical appraisal tools designed for the lay public.
- Readability score may vary for some websites as it may be related to the use of words such as fibromyalgia; this seems to be a word that might rank high in the readability calculation.

## INTRODUCTION

There are more than 70,000 web sites that offer health information for consumers and the number is growing everyday.<sup>1</sup> Many of these websites are accessed by people with fibromyalgia to self-manage their health. However, it is unknown if websites are consistent with the literacy and health needs of users such as persons with fibromyalgia. What we currently know is that web-based information has the potential to educate and empower consumers by providing information on the nature of their health problems and by helping to make informed decisions about their health.<sup>2,3,4,5</sup>

The extent of interest in web based health information is indicated by high and increasing usage.<sup>6,7</sup> In Canada about 8.7 million Canadians use the Internet to search for medical and health-related information. Among these people, women are more likely to search for health information about specific diseases than men.<sup>6</sup> In addition, 54% - 79% of those seeking information expressed concerns about the quality of online health information.<sup>6</sup> Similarly, in the USA, the number of adults who go online for health information has increased from 46% in 2000 to 61% in 2009.<sup>7</sup> Many (66%) of these online health information seekers discuss their concern about the lack of quality of online health information sources with their healthcare providers.<sup>7</sup> Thus, researchers at the Pew Internet and American Life Project anticipate that the more people access the Internet for health information, their concern for the quality will also continue to grow.<sup>7</sup>

The Internet is now an important resource for people living with fibromyalgia.<sup>8,9,10</sup> Fibromyalgia, is described as an invisible chronic condition that has severe impacts on health and quality of life for people who are living with the illness.<sup>11,12,13</sup> This disease manifests itself as chronic widespread musculoskeletal pain in different areas of the body.<sup>14,15,16</sup> The need for information is greater due to the controversy surrounding the condition which includes a lack of specific diagnostics tests and evidence-based treatment guidelines. It has been suggested that people are often left on their own to manage their illness.<sup>17,16</sup>

Daraz and others studied the information needs and preferences of people living with fibromyalgia.<sup>8,9</sup> The majority of the people in those studies expressed their preference of the web as a major source for accessing fibromyalgia-related information. However, they also strongly expressed their concerns about the lack of availability of types of information about fibromyalgia (content), need for evidence-based information (quality) and difficulty in understanding medical or technical terminologies (literacy/readability). A similar study by Crooks demonstrated that people living with fibromyalgia like to go online to access information about fibromyalgia to inform themselves about the illness and to assist with shared decision making with their healthcare providers.<sup>10</sup> However, the perceived lack of quality of online information was a major factor that was also discussed in the study findings. Others have also suggested that web-based health information can increase people's perception of control, improve their ability to cope with the illness, enhance their self-care abilities, and improve their quality of life by decreasing anxiety, fear and distress while increasing hope.<sup>18,19</sup> A number of studies have evaluated the quality of online health information designed for specific populations and found it to be of variable quality.<sup>20,21,22,23,24,25,2,26</sup> It is imperative that people living with fibromyalgia have access to quality evidence-based information to help them live with their illness since it is a

1  
2  
3 chronic disease. Therefore, it is important to evaluate if the information on websites can meet the  
4 needs of persons with fibromyalgia for accessible, high quality, useful information.  
5  
6

7 The purpose of this study was to gain a better understanding of the online  
8 information resources that are available for people living with fibromyalgia and to evaluate  
9 those information resources for content, quality and readability.  
10

## 11 **METHODS**

12  
13  
14 This study was comprised of a keyword search, selecting websites and structured appraisal of the  
15 websites using quality and readability tools. Similar methods were used by others who evaluated  
16 the quality of websites for specific conditions.<sup>20, 21, 24</sup>  
17  
18  
19

### 20 **Search strategies to find online fibromyalgia information resources**

21  
22 In a previous study, the authors identified search terms and engines that women commonly used  
23 when looking for information on fibromyalgia.<sup>8</sup> Based on those findings we performed a  
24 keyword search on 'Google' (www.google.com) with a keyword 'Fibromyalgia' on December  
25 11, 2009 to identify online resources about fibromyalgia that are most likely to be accessed by  
26 people. It has been suggested that lay people seldom search for information beyond the first 20  
27 links retrieved by a search engine so we used this to dictate our website sample.<sup>27</sup>  
28  
29  
30

### 31 **Criteria for selecting online fibromyalgia information resources**

32  
33 Our inclusion criteria for selecting websites were: 1) provide information on fibromyalgia, 2)  
34 provide information for consumers/patients and for their caregivers, and 3) provide information  
35 in English. We excluded duplicate websites or sites with dead links.  
36  
37  
38

### 39 **Quality appraisal tools**

40  
41 DISCERN is a reliable and valid instrument that is used to assess the quality of written consumer  
42 health information which people can use without content expertise.<sup>28</sup> The instrument was  
43 developed and evaluated by an expert panel and a group of health information providers and self-  
44 help members. DISCERN consists of 15 questions (first 8 questions are for publication reliability  
45 and last 7 questions are for the quality of information on treatment choices) where each question  
46 is rated on a 1 to 5 point scale. We assigned scores using the score specified by DISCERN  
47 (Topic Addressed = 5, Partially addressed = 3, Not addressed = 1). This instrument has been  
48 evaluated for reliability and validity and is being used by many researchers to assess the quality  
49 of online health information for specific kinds of diseases.<sup>20, 23, 24</sup> However, DISCERN does not  
50 include many of the criteria that are important for assessing the content of specific information  
51 and for the development and dissemination process to distribute the information, for example,  
52 *accuracy, completeness, disclosure and readability.*<sup>27</sup>  
53  
54  
55

56 As a result, we used a Quality Checklist developed by Daraz and others<sup>29</sup> to assess the  
57 quality of web health information (see Appendix C). This tool was developed based on a  
58  
59  
60

structured review and appraisal of existing web health evaluation tools that were developed to assess the quality of web health information. Based on their review, the authors determined that the existing web health evaluation tools did not meet the criteria for readability and ease of use for general consumers. As a result, they recommended a customized tool / quality checklist designed for general consumers' use. The Quality Checklist consists of 7 categories: 1) Authorship, 2) Content, 3) Currency, 4) Usefulness, 5) Disclosure, 6) User Support and Feedback, and 7) Privacy and Confidentiality. A total of 10 questions are included in the checklist with a 'yes' or 'no' option.

To determine the overall rating of the websites, we also used the total DISCERN score to categorize the websites as excellent (61-75), very good (60-46), good (45-31), marginal (30-16) and poor (15-1). It was not possible to assign similar categories to assess the overall rating of the websites using the Quality Checklist as the tool does not have a numerical scoring scheme like DISCERN.

For the readability evaluation, the information from each websites was evaluated for i) reading ease and ii) grade level calculation using the actual content from the websites. For the reading ease calculation we used "The Flesch Reading Ease (RE)"<sup>30, 31</sup> score maps that were designed to measure the readability of texts. The RE index is 0 to 100. An RE of around 60 to 70 is equivalent to a grade level of 6 to 8. The closer to 100 the text scores, the easier it is to read.<sup>30, 31</sup>

|          |             |         |                  |
|----------|-------------|---------|------------------|
| 90 - 100 | Very easy   | 50 - 59 | Fairly difficult |
| 80 - 89  | Easy        | 30 - 49 | Difficult        |
| 70 - 79  | Fairly easy | 0 - 29  | Very confusing   |
| 60 - 69  | Standard    |         |                  |

For grade level calculation we used "The Flesch-Kincaid Grade Level" formula. It is recommended that anyone who aims to provide health information should try to achieve a grade level of 6 to 8. The scores using the 'Flesch Reading Ease' formula can be interpreted in the following format.<sup>30, 31</sup>

## DATA EXTRACTION AND ANALYSIS

High quality information exists when the information on websites is consistent with the best research; high quality websites are those which have certain standards for how they are produced.<sup>33, 20, 34</sup> By 'content' we refer to specific information about fibromyalgia addressed: for example, treatment, diet, finding specialists etc; and by 'readability' we refer to reading ease and grade level. By 'quality' we refer to overall website quality, not the analysis of specific pieces of information on the website. Rather, website quality looks at the extent to which efforts were made to insure the information on the website is current and accurate based on current evidence/knowledge.

A data extraction tool was devised to allow reviewers to categorize the content contained on fibromyalgia websites. Categories were developed using concepts derived from both



1  
2  
3 qualitative and quantitative research<sup>8,9</sup>; open-ended categories were later classified if concepts  
4 were reported that were not preconceived by the structured items. The data extraction table  
5 included: *country of origin*, *target audience*, *category of websites* and *types of content*. Websites  
6 were categorized as not-for-profit (e.g., societies, association, charitable, support group),  
7 commercial (e.g., private medical site, sponsored site), media (e.g., newspapers), and  
8 institutional (e.g., university or government).  
9  
10

11 To assess reliability of evaluation, each site was independently rated by the authors.  
12 Although kappa scores were not tabulated, the reviewers extensively discussed each question  
13 where scoring was different and they continued until the scoring conflicts were resolved. We  
14 used simple descriptive statistics to analyze the data. SPSS version 18<sup>1</sup> was used in our analysis  
15 for calculating frequencies and cross-tabulations.  
16  
17  
18

## 19 RESULTS

20  
21 Google retrieved 6,720,000 results for the keyword search. Among these, the first 25 websites  
22 were selected for analysis (Table 1). The country of origin for thirteen (52%) of the websites was  
23 USA, eight (32%) were from Canada, one from UK and the rest had no country specified (Table  
24 1). The category of websites varied. Ten (40%) were not-for-profit organizations, six (24%) were  
25 commercial, five (20%) were media, and four (16%) were institutional. Only five (20%) websites  
26 were dedicated to women.  
27  
28

29  
30 Figure 1 shows the types of information provided by selected websites. In addition to  
31 these kinds there were other types of information available on the selected websites, such as  
32 complications (8%), controversies (8%), exercise (8%), lifestyle guide (8%), education (4%),  
33 employment (4%), psychological issues (4%), quality of life (4%) and self-help (4%)  
34  
35  
36  
37

38 Figure 1. Types of information available on selected websites  
39  
40  
41  
42  
43  
44  
45  
46  
47  
48  
49  
50  
51  
52  
53  
54  
55  
56

---

57  
58 <sup>1</sup> <http://www.spss.com/>  
59  
60

Table 1: 25 Selected sites and their overall scores

| Website url                                                                                                                            | Developer Origin                                                                             | DISCERN Score - 75 | Quality Checklist % (Yes) | Readability (Grade level) |
|----------------------------------------------------------------------------------------------------------------------------------------|----------------------------------------------------------------------------------------------|--------------------|---------------------------|---------------------------|
| Fibromyalgia Treatment Center <sup>35</sup><br><a href="http://www.fibromyaliatreatment.com/">http://www.fibromyaliatreatment.com/</a> | Fibromyalgia Treatment Center, Inc/USA                                                       | 22                 | 80                        | 7                         |
| Fibromyalgia Network <sup>36</sup><br><a href="http://www.fmnetnews.com/">http://www.fmnetnews.com/</a>                                | Not specified/USA                                                                            | 38                 | 60                        | 8                         |
| Medline Plus <sup>37</sup><br><a href="http://www.nlm.nih.gov/medlineplus">http://www.nlm.nih.gov/medlineplus</a>                      | National Library of Medicine and National Institutes of Health /USA                          | 40                 | 80                        | 8                         |
| Women's Health Matters <sup>38</sup><br><a href="http://www.womenshealthmatters.ca">http://www.womenshealthmatters.ca</a>              | Women's College Hospital and the Women's College Research Institute /Canada                  | 46                 | 80                        | 8                         |
| Body and Health <sup>39</sup><br><a href="http://bodyandhealth.canada.com">http://bodyandhealth.canada.com</a>                         | MediResource /Canada                                                                         | 27                 | 30                        | 9                         |
| The Environmental Illness Resource <sup>40</sup><br><a href="http://www.ei-resource.org/">http://www.ei-resource.org/</a>              | Matthew Hogg /UK                                                                             | 32                 | 70                        | 9                         |
| Fibromyalgia Support <sup>41</sup><br><a href="http://www.fibromyalgia-support.org">http://www.fibromyalgia-support.org</a>            | Global Healing Center /USA                                                                   | 28                 | 90                        | 9                         |
| FM-CFS Canada <sup>42</sup><br><a href="http://fm-cfs.ca/fm.html">http://fm-cfs.ca/fm.html</a>                                         | FM-CFS Canada /Canada                                                                        | 55                 | 80                        | 9                         |
| Wikipedia, the free encyclopedia<br><a href="http://en.wikipedia.org">http://en.wikipedia.org</a> <sup>43</sup>                        | Wikimedia Foundation, Inc./USA                                                               | 40                 | 80                        | 10                        |
| Canadian Women's Health Network <sup>44</sup><br><a href="http://www.cwhn.ca">http://www.cwhn.ca</a>                                   | The Canadian Women's Health Network and the Centres of Excellence for Women's Health /Canada | 34                 | 60                        | 10                        |
| MedicineNet.com <sup>45</sup><br><a href="http://www.medicinenet.com">http://www.medicinenet.com</a>                                   | MedicineNet, Inc./USA                                                                        | 45                 | 80                        | 10                        |
| Fibromyalgia Symptoms <sup>46</sup><br><a href="http://www.fibromyaliasympoms.org/">http://www.fibromyaliasympoms.org/</a>             | Not specified                                                                                | 46                 | 40                        | 10                        |

---

|    |    |   |                                                                                              |                                                                            |    |     |    |
|----|----|---|----------------------------------------------------------------------------------------------|----------------------------------------------------------------------------|----|-----|----|
| 1  | 2  | 3 | About.com <sup>47</sup>                                                                      | The New York Times Company/USA                                             | 46 | 90  | 10 |
| 4  | 5  |   | <a href="http://chronicfatigue.about.com">http://chronicfatigue.about.com</a>                |                                                                            |    |     |    |
| 6  | 7  |   | Women and Fibromyalgia <sup>48</sup>                                                         | Book written by Barbara Keddy/Canada                                       | 23 | 60  | 10 |
| 8  | 9  |   | <a href="http://womenandfibromyalgia.com/">http://womenandfibromyalgia.com/</a>              |                                                                            |    |     |    |
| 10 | 11 |   | National Fibromyalgia Partnership <sup>49</sup>                                              | The National Fibromyalgia Partnership, Inc/ not specified                  | 50 | 60  | 10 |
| 12 | 13 |   | <a href="http://www.fmpartnership.org/">http://www.fmpartnership.org/</a>                    |                                                                            |    |     |    |
| 14 | 15 |   | Fibromyalgia Chronic Fatigue <sup>50</sup>                                                   | Clymer Healing Center /USA                                                 | 21 | 50  | 10 |
| 16 | 17 |   | <a href="http://www.chronicfatigue.org/">http://www.chronicfatigue.org/</a>                  |                                                                            |    |     |    |
| 18 | 19 |   | Autoimmunity Research Foundation <sup>51</sup>                                               | Autoimmunity Research Foundation /USA                                      | 24 | 70  | 11 |
| 20 | 21 |   | <a href="http://bacteriality.com">http://bacteriality.com</a>                                |                                                                            |    |     |    |
| 22 | 23 |   | Fibromyalgia Information <sup>52</sup>                                                       | Woman to Woman Computing/Canada                                            | 52 | 90  | 11 |
| 24 | 25 |   | <a href="http://fibromyalgia.ncf.ca/">http://fibromyalgia.ncf.ca/</a>                        |                                                                            |    |     |    |
| 26 | 27 |   | Ontario Fibromyalgia Association <sup>53</sup>                                               | Not specified/Canada                                                       | 23 | 40  | 11 |
| 28 | 29 |   | <a href="http://www.hwcn.org/~aq226/">http://www.hwcn.org/~aq226/</a> ( no longer activated) |                                                                            |    |     |    |
| 30 | 31 |   | NIAMSD <sup>54</sup>                                                                         | National Institute of Arthritis and Musculoskeletal and Skin Diseases /USA | 49 | 100 | 11 |
| 32 | 33 |   | <a href="http://www.niams.nih.gov">http://www.niams.nih.gov</a>                              |                                                                            |    |     |    |
| 34 | 35 |   | Fibromyalgia Information Foundation <sup>55</sup>                                            | Oregon Health & Science University/USA                                     | 51 | 90  | 11 |
| 36 | 37 |   | <a href="http://www.myalgia.com/">http://www.myalgia.com/</a>                                |                                                                            |    |     |    |
| 38 | 39 |   | Fibro Hugs <sup>56</sup>                                                                     | Ken Euteneier / not specified                                              | 16 | 40  | 12 |
| 40 | 41 |   | <a href="http://fibrohugs.com/">http://fibrohugs.com/</a>                                    |                                                                            |    |     |    |
| 42 | 43 |   | Mayo Clinic <sup>57</sup>                                                                    | Mayo Foundation for Medical Education and Research/USA                     | 45 | 90  | 13 |
| 44 | 45 |   | <a href="http://mayoclinic.com/">http://mayoclinic.com/</a>                                  |                                                                            |    |     |    |
| 46 | 47 |   | BC fibromyalgia Society <sup>58</sup>                                                        | MEFM Societies of BC /Canada                                               | 28 | 70  | 13 |
| 48 | 49 |   | <a href="http://www.mefm.bc.ca">http://www.mefm.bc.ca</a>                                    |                                                                            |    |     |    |
|    |    |   | Neurology channel <sup>59</sup>                                                              | Healthcommunities.com, Inc. /USA                                           | 41 | 80  | 15 |
|    |    |   | <a href="http://www.neurologychannel.com">http://www.neurologychannel.com</a>                |                                                                            |    |     |    |

---

Note: List based on lower to highest readability scores

1  
2  
3  
4 Figure 2 demonstrates websites reliability and quality of treatment information as  
5 measured by DISCERN. The mean score of all 15 questions combined was 2.49 out of 5. No  
6 question received a mean score of 4 or more. The questions that received the lowest score were  
7 related to sources of information, areas of uncertainty, side effects of treatments, effects of no  
8 treatment, effect on quality of life and shared decision-making. According to the DISCERN  
9 score, websites were also categorized as very good (32%), good (32%) and marginal (36%). The  
10 mean overall DISCERN score was 36.88 (good).  
11  
12

13 Figure 3 shows the combined Quality Checklist scores for the websites. The questions  
14 that received highest rating were contact information, confidentiality, ownership and useable  
15 /understandable.  
16  
17

18  
19 Figure 2. Combined scores of the DISCERN reliability and quality of treatment information  
20  
21

22 Figure 3. Combined scores of the Quality Checklist questions (percentage of option 'yes')  
23  
24

25 The readability test showed that the reading level for fourteen (56%) websites was  
26 between grades 10 to 12, seven websites (28%) between grades 8 to 9, and one website (4%)  
27 between grades 6 to 7. Twelve percent were college level and none scored for grade 1 to 5 (Table  
28 1).  
29

30 Table 2 shows five highest ranked websites according to scores from DISCERN, Quality  
31 Checklist and Flesch Reading Ease.  
32  
33  
34  
35  
36  
37  
38  
39  
40  
41  
42  
43  
44  
45  
46  
47  
48  
49  
50  
51  
52  
53  
54  
55  
56  
57  
58  
59  
60

Table 2. Five top ranked websites based on DISCERN, Quality Checklist and The Flesch Reading Ease scores

| Tool                | Website                                                                                                                                                                                                                                                                                 |
|---------------------|-----------------------------------------------------------------------------------------------------------------------------------------------------------------------------------------------------------------------------------------------------------------------------------------|
| DISCERN             | <ol style="list-style-type: none"> <li>1. FM-CFS Canada</li> <li>2. Fibromyalgia Information</li> <li>3. Fibromyalgia Information Foundation</li> <li>4. National Fibromyalgia Partnership</li> <li>5. National Institute of Arthritis and Musculoskeletal and Skin Diseases</li> </ol> |
| Quality Checklist   | <ol style="list-style-type: none"> <li>1. National Institute of Arthritis and Musculoskeletal and Skin Diseases</li> <li>2. Fibromyalgia Support</li> <li>3. About.com</li> <li>4. Fibromyalgia Information</li> <li>5. Fibromyalgia Information Foundation</li> </ol>                  |
| Flesch Reading Ease | <ol style="list-style-type: none"> <li>1. Fibromyalgia Treatment Center</li> <li>2. Fibromyalgia Network</li> <li>3. Medline Plus</li> <li>4. Women's Health Matters</li> <li>5. Body and Health</li> </ol>                                                                             |

## DISCUSSION

The results of this study suggest that fibromyalgia websites vary with respect to content, quality and readability. There is considerable variability between the average scores from DISCERN, the Quality Checklist and the Flesch Reading Ease. In cases where the quality of websites was good readability was often poor. There are only three websites: Fibromyalgia Information<sup>52</sup>, Fibromyalgia Information Foundation<sup>55</sup> and National Institute of Arthritis and Musculoskeletal and Skin Diseases<sup>54</sup> that consistently rated with higher levels of quality (Table 1). Unfortunately, since these had high reading levels (Grade 11), they are not likely to be accessible by people with lower literacy.

Most commonly the content of websites addressed symptoms, treatment, and diagnosis. Many websites lacked information about important topics that patients have identified as significant such as causes of fibromyalgia, research, supports, alternative therapies, impact, and specialists that might help them understand and manage an illness.<sup>8,9,60</sup> As a result, people looking for these types of information on the web will find little on these aspects of information on fibromyalgia. More efforts are needed to include comprehensive information on the websites that provide customized information for people with fibromyalgia.

Websites quality scoring between the two quality appraisal tools resulted in different rankings. This can be attributed to having different items and scoring. Others have shown that there is considerable variability in the critical appraisal tools used for evaluating research<sup>33</sup> and it appears that a similar trend is evolving with respect to websites. While DISCERN seems to be most commonly used currently in the literature, it is important for those conducting reviews to evaluate whether the critical appraisal tool is most appropriate for their individual study.

This study focused on assessing the quality of a website from the perspective of a lay person.<sup>26,23</sup> Lay 'quality' assessments assumes practices that indicate more rigorous development and authorship will lead to more timely and accurate information. That is because the general public cannot be assigned the task of verifying the accuracy of specific medical or scientific information on the website. This study indicates websites do not adequately identify the sources of information that are provided on the websites nor the timeliness of posted information. It has been suggested that providing a date does not necessarily mean that the information is correct or up-to-date.<sup>2</sup> However, when asking the lay public to assess information currency, this is a reasonable proxy. The true assessment of website currency would be to track down whether recent evidence was incorporated. This is not a reasonable expectation for the lay public. Similarly, providing contact information is thought to be associated with authors who take responsibility for information provided on their website, but a variety of motivations may be behind what specific elements are added to websites. This study focused on assessment of website quality from the perspective of the consumer. We also observed that two different tools (DISCERN and the Quality Checklist) designed for the lay public provided different scores and rankings. We have no way of knowing whether one tool provided a more valid assessment than the other. However, both scales agreed on 3 (Fibromyalgia Information<sup>52</sup>, Fibromyalgia Information Foundation<sup>55</sup> and National Institute of Arthritis and Musculoskeletal and Skin Diseases<sup>54</sup>) out of 5 websites that placed in the top 5 websites list (Table 2) suggesting a level of concurrent validity. Studies that assess the extent to which different lay indicators of quality are

1  
2  
3 associated with actual quality and accuracy of information are needed to assess the criterion  
4 validity of these scales.  
5  
6

7 This review demonstrates that a substantial proportion of the most accessible websites  
8 that are fibromyalgia information resources do not meet the criteria established for website  
9 quality undermining the confidence that users can place in the accuracy of the information  
10 contained within these resources. More attention is needed from healthcare providers and  
11 websites developers so that they can work together to provide more consistent information for  
12 people living with fibromyalgia. There is also a need to determine which criterion can be most  
13 useful and accurate for lay individuals to assess website quality.  
14  
15

16 Another major finding of this review is that people need a high level of education to  
17 understand online information on fibromyalgia particularly on high quality websites. For  
18 example, the National Institute of Arthritis and Musculoskeletal and Skin Diseases website  
19 provides good quality information about fibromyalgia; however, a person with fibromyalgia  
20 needs a grade level of II to understand and to use that information. Only four (Fibromyalgia  
21 Treatment Center<sup>35</sup>, Fibromyalgia Network<sup>36</sup>, Medline Plus<sup>37</sup>, Women's Health Matters<sup>38</sup>) of the  
22 websites meet the literacy level for the general population. "High readability requirements  
23 decrease information accessibility and potentially exclude users with low literacy skills".<sup>61</sup> Using  
24 the web to provide useable quality information remains elusive. A common concern among  
25 people living with chronic illnesses including people with fibromyalgia is that difficult medical  
26 terminology is a major barrier for them to access and use online health information efficiently.<sup>8, 9,</sup>  
27 <sup>20, 61</sup> Online information on fibromyalgia needs to be written at or below a grade 8 level so that  
28 all people are able to read the information and use it to participate in their own health decision-  
29 making. This suggests that people with health literacy expertise should be involved in website  
30 development.  
31  
32  
33  
34

35 Overall, there is evidence that there are inconsistencies across websites for providing  
36 information on content, overall quality and readability which are consistent with others who  
37 evaluated websites for other chronic conditions.<sup>2, 26</sup> People living with fibromyalgia have  
38 expressed a strong need for information and a dependency on web-based information as a  
39 primary source. This indicates that more effort is needed to ensure that the information provided  
40 on fibromyalgia websites meets the information needs, quality and suggested readability criteria.  
41  
42  
43

## 44 **LIMITATIONS OF THE STUDY**

45  
46  
47 A number of limitations should be considered when interpreting our results. First, our search was  
48 not comprehensive as we only used 'Google' and one keyword to search for online fibromyalgia  
49 resources. We selected Google and "fibromyalgia" as these were most commonly used by our  
50 target audience<sup>8</sup>, but recognized that other search engines and combination of multiple key words  
51 may have produced different results.  
52  
53

54 Some limitations are noted by the way that items on the Quality Checklist are formatted.  
55 Since some items have multiple questions that required a single yes/ no answer, reviewers  
56 sometimes had difficulty selecting an option when partial credit was assigned. In addition, there  
57 is lack of evidence available to validate the Quality Checklist. Thus some of the differences  
58  
59  
60



1  
2  
3 between DISCERN and the Quality Checklist relate to scoring methods. Finally, we have no  
4 gold standard for whether these websites were quality websites. We addressed the quality issue  
5 using the lens of two critical appraisal tools designed for the lay public. A review that perform a  
6 detailed analysis of recommendations on the website and determine whether they are consistent  
7 with the highest quality evidence would have determined if the information itself was high  
8 quality. Finally, the readability score may vary for some websites as it may be related to the use  
9 of words such as fibromyalgia, since this seems to be a word that might rank low in the  
10 readability calculation.  
11  
12

## 13 14 15 **CONCLUSION AND IMPLICATIONS FOR PRACTICE**

16  
17 The Internet is changing the way that people gather information about dealing with chronic  
18 conditions like fibromyalgia and has the potential to facilitate disease 'self-management'. This  
19 study has determined that the majorities of the existing online fibromyalgia resources do not  
20 provide adequate information that are needed to fulfill people's need, lack quality and do not  
21 meet literacy standards for lay public information. This suggests that there is potential for  
22 misinformation when people with fibromyalgia access web-based health information. Healthcare  
23 and social service providers need to be aware of this state of online fibromyalgia resources so  
24 that they are able to provide better services to people with fibromyalgia. Healthcare providers  
25 will need to help their patients navigate and interpret appropriate web-based information.  
26  
27

## 28 29 **ACKNOWLEDGEMENT**

30  
31 This work was supported from a Doctoral Research Award (Frederick Banting and Charles Best  
32 Scholarship) from the CIHR; a Strategic Training Fellowship in Rehabilitation Research from  
33 the CIHR Musculoskeletal and Arthritis Institute; a S. Leonard Syme Training Fellowship from  
34 the Institute for Work & Health; and a MSK Training Fellowship from the Ontario Rehabilitation  
35 Research Advisory Network to Lubna Daraz.  
36  
37

38 **There are no competing interests.**  
39

## 40 41 **REFERENCES**

- 42 1. **Grandinetti DA.** Doctors and the Web: Help your patients surf the Net safely. *Med Econo*  
43 2000; 63(8) April: 28–34.
- 44 2. **Hoffman-Goetz L, Clarke NJ.** Quality of Breast Cancer Sites on the World Wide Web. *Can J*  
45 *Public Health.* 2000; 91 (4): 281-284.
- 46 3. **Sillence E, Briggs P, Harris P, Fishwick L.** Going online for health advice: Changes in usage  
47 and trust practices over the last five years. *Interac Comp* 2007; 19 (3): 397- 406.
- 48 4. **Campbell RJ.** Older women and the Internet. *J Women Aging.* 2004; 16 (1/2): 161-174
- 49 5. **Pandey S, Hart J J, Tiwary S.** Women's health and the internet: understanding emerging  
50 trends and implications. *Soc Sc Med* 2003; 56: 179-191.  
51  
52  
53  
54  
55  
56  
57  
58  
59  
60



- 1  
2  
3  
4  
5  
6  
7  
8  
9  
10  
11  
12  
13  
14  
15  
16  
17  
18  
19  
20  
21  
22  
23  
24  
25  
26  
27  
28  
29  
30  
31  
32  
33  
34  
35  
36  
37  
38  
39  
40  
41  
42  
43  
44  
45  
46  
47  
48  
49  
50  
51  
52  
53  
54  
55  
56  
57  
58  
59  
60
6. **Statistics Canada.** Canadian Internet Use Survey (CIUS). <http://www.statcan.gc.ca/> (accessed 3 Feb 2011).
7. **Fox S, Rainie L.** The social life of health information. Pew Internet & American Life Project. 2009. [http://www.pewinternet.org/~media/Files/Reports/2009/PIP\\_Health\\_2009.pdf](http://www.pewinternet.org/~media/Files/Reports/2009/PIP_Health_2009.pdf) (accessed 4 Feb 2011).
8. **Daraz L, MacDermid JC, Wilkins S, Shaw S, Gibson J.** Experiences of women living with Fibromyalgia – an exploratory study of their information needs and preferences. (Daraz L - PhD Dissertation Chapter 1). 2010.
9. **Daraz L, MacDermid J C, Wilkins S, Shaw S, Gibson J.** Information preferences of people living with Fibromyalgia – a survey of their information needs and preferences. (Daraz L - PhD Dissertation Chapter 2). 2010.
10. **Crooks VA.** I go on the Internet; I always, you know, check to see what’s new” chronically ill women’s use of online health information to shape and inform doctor-patient interactions in the space of care provision. *ACME: An Interna E-J Critical Geo* 2006; 5(1): 50-69.
11. **Weir PT, Harlan GA, Nkoy FL, Jones SS, Hegmann KT, Gren LH et al.** The incidence of fibromyalgia and its associated comorbidities: a population-based retrospective cohort study based on international classification of diseases, 9th revision codes. *J Clin Rheumatol* 2006 Jun;12(3):124-8.
12. **Schaefer, KM.** The Lived Experience of Fibromyalgia in African American Women. *Holis Nurs Practice* 2005; 19(1): 17-25.
13. **Gunilla M. Liedberg, Cris M. Henriksson.** Factors of Importance for work disability in women with fibromyalgia: an interview study. *Arthritis Care Res* 2002; 47 (3): 266-274.
14. **Williams DA, Clauw DJ.** (2009). Understanding fibromyalgia: Lessons from the broader pain research community. *J of Pain* 2009; 10 (8):777-791.
15. **Neumann L, Buskila D.** Epidemiology of Fibromyalgia. *Current Pain Head Reports* 2003; 7:362–368.
16. **Lempp HK, Hatch SL, Carville SF, Choy EC.** (2009). Patients' experiences of living with and receiving treatment for fibromyalgia syndrome: a qualitative study. *BMC Musculos Dis* 2009; 10(124).
17. **Kool MB, Middendorp HV, Boeije HR, Geenen R.** Understanding the lack of understanding: invalidation from the perspective of the patient with fibromyalgia. *Arthr Rheum and Rheum* 2009; 15; 61(12):1650-6.

18. **Taylor LR**. Patients turn to Dr. Google for health information – good and bad. Journal staff. [http://www.rapidcityjournal.com/lifestyles/article\\_32d777ca-ec1e-11de-aab5-001cc4c03286.html](http://www.rapidcityjournal.com/lifestyles/article_32d777ca-ec1e-11de-aab5-001cc4c03286.html) (accessed 22 January 2011).
19. **Eysenbach G**, Kohler C. How do consumers search for and appraise health information on the World Wide Web? Qualitative study using focus groups, usability tests, and in-depth interviews. *BMJ* 2002; 324: 573-577.
20. **Thompson AE**, Graydon SL. Patient-oriented methotrexate information sites on the Internet: a review of completeness, accuracy, format, reliability, credibility, and readability. *J Rheum* 2009; 36 (1): 41-48.
21. **Hanif F**, Abayasekara K, Willcocks L, Jolly EC, Jamieson NV, Praseedom RK, et al. The quality of information about kidney transplantation on the World Wide Web. *Clinical Transpl* 2007; 21(3):371-6.
22. **Martin-Facklam M**, Kostrzewa M, Martin P, Haefeli WE. Quality of drug information on the World Wide Web and strategies to improve pages with poor information quality. An intervention study on pages about sildenafil. *Brit J Clin Pharm* 2004;57(1):80-5.
23. **Khazaal Y**, Fernandez M A, Cochand S, Reboh I, Zullino D. (2008). Quality of web-based information on social phobia: a cross-sectional study. *Depres Anxiety* 2008; 25: 461-465.
24. **Hargrave DR**, Hargrave UA, Bouffet E. Quality of health information on the Internet in pediatric neuro-oncology. *Neuro-Oncol* 2006; 8(2): 175-182.
25. **Griffiths KM**, Christensen H. The quality and accessibility of Australian depression sites on the World Wide Web. *Medi J Australia* 2002; 176(10 Suppl):97-104.
26. **Al-Bahrani A**, Plusa S. The quality of patient-oriented internet information on colorectal cancer. *Color Disea* 2004; 6: 323-326.
27. **Eysenbach G**, Powell J, Kuss O, Sa ER. Empirical studies assessing the quality of health information for consumers on the World Wide Web. A systematic review. *JAMA* 2002; 287 (20).
28. **Charnock D**, Shepperd S, Needham G, Gann R. DISCERN: an instrument for judging the quality of written consumer health information on treatment choices. *J Epidem Commu Health* 1999; 53:105–111.
29. **Daraz L**, MacDermid JC, Wilkins S, Shaw S. Tools to Evaluate the Quality of Web Health Information: A Structured Review of Content and Usability. *Interna J Techn Knowle Soc* 2009; 5 (3).
30. **Colman MA**. *Dictionary of Psychology*. Oxford University Press, 2001

- 1  
2  
3 31. **The Flesch Reading Ease.** Readability Formulas.com. Free Readability Assessment.  
4 <http://www.readabilityformulas.com/free-readability-formula-assessment.php> (accessed 22  
5 January 2011).  
6  
7
- 8 32. **D'Alessandro DM**, Kingsley P, Johnson-West J. The readability of pediatric patient  
9 education materials on the World Wide Web. Arch Pedia Adole Med 2001; 155: 807-812  
10
- 11 33. **Katrak P**, Bialocerkowski EA, Massy-Westropp N, Kumar S, Grimmer AK. A systematic  
12 review of the content of critical appraisal tools. BMC Med Res Metho 2004, 4:22.  
13  
14
- 15 34. **Jordan JE**, Osborne RH, Buchbinder R. Critical appraisal of health literacy indices revealed  
16 variable underlying constructs, narrow content and psychometric weaknesses. J Clin  
17 Epidemiol 2010 [Epub ahead of print]  
18  
19
- 20 35. **Fibromyalgia Treatment Center.** <http://www.fibromyalgiatreatment.com/> (accessed 11  
21 December 2009)  
22
- 23 36. **Fibromyalgia Network.** <http://www.fmnetnews.com/> (accessed 11 December 2009)  
24
- 25 37. **Medline Plus.** <http://www.nlm.nih.gov/medlineplus> (accessed 11 December 2009)  
26  
27
- 28 38. **Women's Health Matters.** <http://www.womenshealthmatters.ca>(accessed 11 December  
29 2009)  
30
- 31 39. **Body and Health.** <http://bodyandhealth.canada.com> (accessed 11 December 2009)  
32  
33
- 34 40. **The Environmental Illness Resource.** <http://www.ei-resource.org> (accessed 11 December  
35 2009)  
36
- 37 41. **Fibromyalgia Support.** <http://www.fibromyalgia-support.org> (accessed 11 December 2009)  
38  
39
- 40 42. **FM-CFS Canada.** <http://fm-cfs.ca/fm.html>(accessed 11 December 2009)  
41
- 42 43. **Wikipedia, the free encyclopedia.** <http://en.wikipedia.org> (accessed 11 December 2009)  
43  
44
- 45 44. **Canadian Women's Health Network.** <http://www.cwhn.ca/> (accessed 11 December 2009)  
46
- 47 45. **MedicineNet.com.** <http://www.medicinenet.com> (accessed 11 December 2009)  
48
- 49 46. **Fibromyalgia Symptoms.** <http://www.fibromyalgiasymptoms.org/>(accessed 11 December  
50 2009)  
51
- 52 47. **About.com.** <http://chronicfatigue.about.com> (accessed 11 December 2009)  
53  
54
- 55 48. **Women and Fibromyalgia.** <http://www.myalgia.com/> (accessed 11 December 2009)  
56  
57  
58  
59  
60

- 1
- 2
- 3
- 4 49. **National Fibromyalgia Partnership.** <http://www.fmpartnership.org/> (accessed 11
- 5 December 2009)
- 6
- 7 50. **Fibromyalgia Chronic Fatigue.** <http://www.chronicfatigue.org/> (accessed 11 December
- 8 2009)
- 9
- 10 51. **Autoimmunity Research Foundation.** <http://bacteriality.com>(accessed 11 December 2009)
- 11
- 12 52. **Fibromyalgia Information.** <http://fibromyalgia.ncf.ca/> (accessed 11 December 2009)
- 13
- 14 53. **Ontario Fibromyalgia Association.** <http://www.hwcn.org> (accessed 11 December 2009)
- 15
- 16 54. **National Institute of Arthritis and Musculoskeletal and Skin Diseases.** (NIAMSD)
- 17 <http://www.niams.nih.gov> (accessed 11 December 2009)
- 18
- 19 55. **Fibromyalgia Information Foundation.** <http://www.myalgia.com/> (accessed 11 December
- 20 2009)
- 21
- 22 56. **Fibro Hugs.** <http://fibrohugs.com/> (accessed 11 December 2009)
- 23
- 24 57. **Mayo Clinic.** <http://mayoclinic.com/> (accessed 11 December 2009)
- 25
- 26 58. **BC fibromyalgia Society.** <http://www.mefm.bc.ca>(accessed 11 December 2009)
- 27
- 28 59. **Neurology channel.** <http://www.neurologychannel.com> (accessed 11 December 2009)
- 29
- 30 60. **Murray E,** Burns J, See Tai S, Lai R, Nazareth I. Interactive Health Communication
- 31 Applications for people with chronic disease. *Cochr Data Syst Revi*2005; 4. Art. No.:
- 32 CD004274.
- 33
- 34 61. **Thomson MD,** Hoffman-Goetz L. Readability and cultural sensivity of web-based patient
- 35 decision aids for cancer screening and treatment: A systematic review. *Medi Inform Intern*
- 36 *Med* 2007; 32(4): 263-286
- 37
- 38
- 39
- 40
- 41
- 42
- 43
- 44
- 45
- 46
- 47
- 48
- 49
- 50
- 51
- 52
- 53
- 54
- 55
- 56
- 57
- 58
- 59
- 60

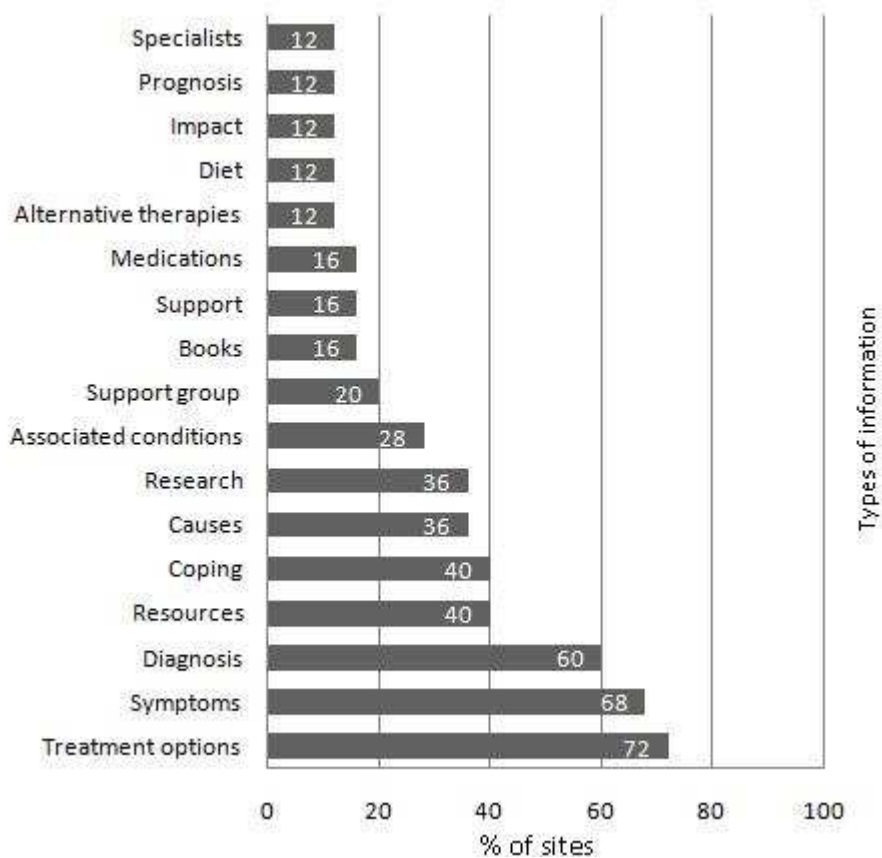

128x115mm (96 x 96 DPI)

For peer review only

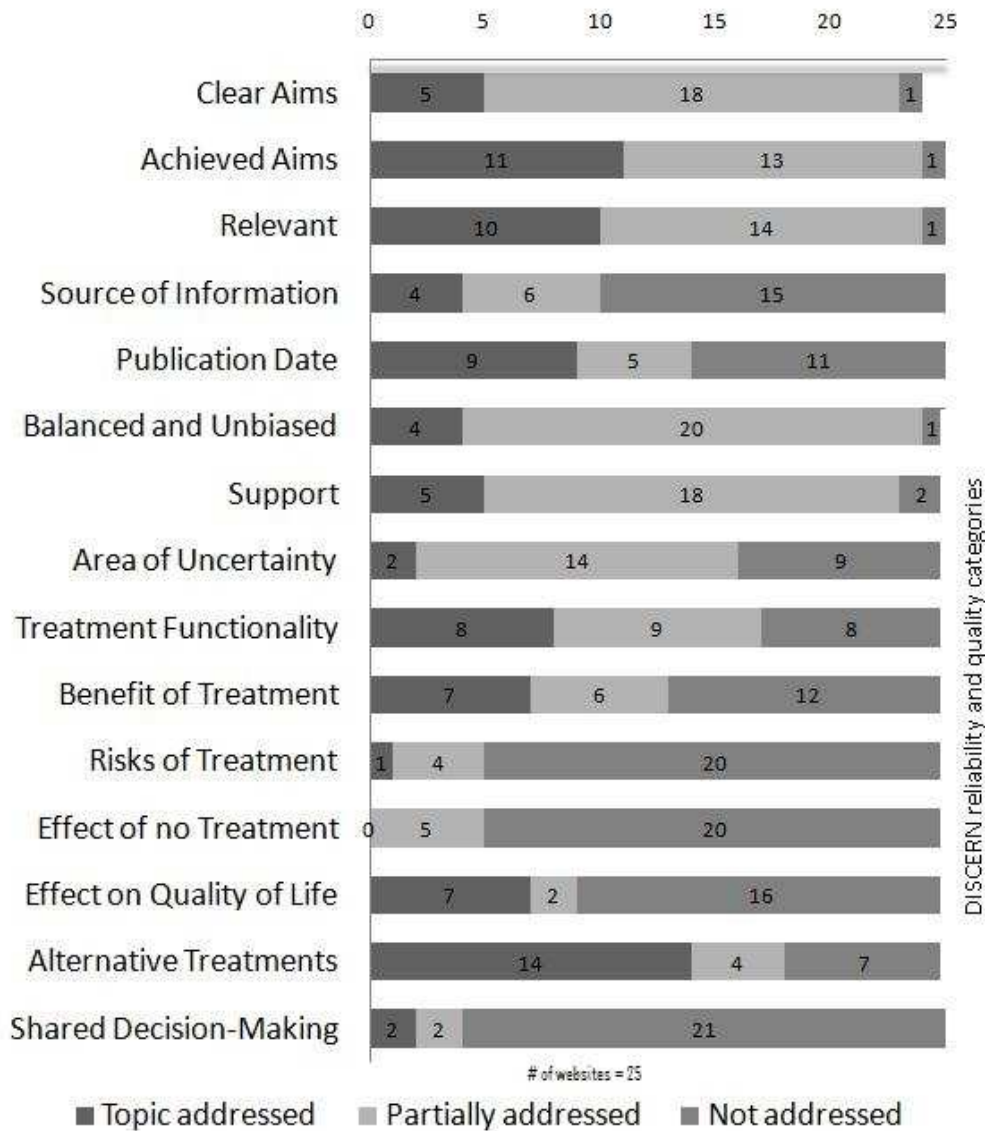

Combined scores of the DISCERN reliability and quality of treatment information  
148x174mm (96 x 96 DPI)

1  
2  
3  
4  
5  
6  
7  
8  
9  
10  
11  
12  
13  
14  
15  
16  
17  
18  
19  
20  
21  
22  
23  
24  
25  
26  
27  
28  
29  
30  
31  
32  
33  
34  
35  
36  
37  
38  
39  
40  
41  
42  
43  
44  
45  
46  
47  
48  
49  
50  
51  
52  
53  
54  
55  
56  
57  
58  
59  
60

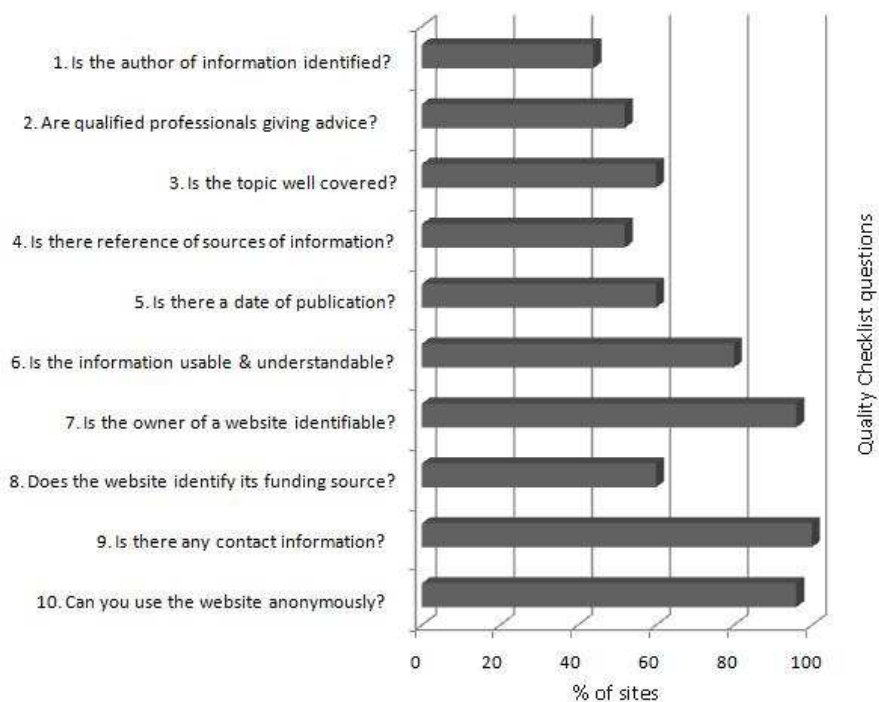

Combined scores of the Quality Checklist questions (percentage of option 'yes')  
175x129mm (96 x 96 DPI)

ew only

To view the full contents of this document, you need a later version of the PDF viewer. You can upgrade to the latest version of Adobe Reader from [www.adobe.com/products/acrobat/readstep2.html](http://www.adobe.com/products/acrobat/readstep2.html)

For further support, go to [www.adobe.com/support/products/acrreader.html](http://www.adobe.com/support/products/acrreader.html)



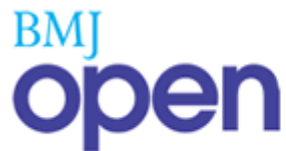

**The quality of websites addressing fibromyalgia – an assessment of quality and readability using standardized tools.**

|                                 |                                                                                                                                                                                                                                                                                                                                                    |
|---------------------------------|----------------------------------------------------------------------------------------------------------------------------------------------------------------------------------------------------------------------------------------------------------------------------------------------------------------------------------------------------|
| Journal:                        | <i>BMJ Open</i>                                                                                                                                                                                                                                                                                                                                    |
| Manuscript ID:                  | bmjopen-2011-000152.R1                                                                                                                                                                                                                                                                                                                             |
| Article Type:                   | Research                                                                                                                                                                                                                                                                                                                                           |
| Date Submitted by the Author:   | 04-Jul-2011                                                                                                                                                                                                                                                                                                                                        |
| Complete List of Authors:       | Daraz, Lubna; McMaster University, School of Rehabilitation Science<br>MacDermid, Joy; McMaster University, School of Rehabilitation Science<br>Wilkins, Seanne; McMaster University, School of Rehabilitation Science<br>Gibson, Jane; Institute for Work and Health<br>Shaw, Lynn; University of Western Ontario, School of Occupational Therapy |
| <b>Primary Subject Heading</b>: | Health informatics                                                                                                                                                                                                                                                                                                                                 |
| Keywords:                       | Health informatics < BIOTECHNOLOGY & BIOINFORMATICS, Information technology < BIOTECHNOLOGY & BIOINFORMATICS, Pain management < ANAESTHETICS, Health policy < HEALTH SERVICES ADMINISTRATION & MANAGEMENT, MEDICAL EDUCATION & TRAINING, PUBLIC HEALTH                                                                                             |
|                                 |                                                                                                                                                                                                                                                                                                                                                    |

SCHOLARONE™  
Manuscripts

**Article title:**

The quality of websites addressing fibromyalgia – an assessment of quality and readability using standardized tools.

**Authors:**

Lubna Daraz, PhD  
School of Rehabilitation Science  
Faculty of Health Sciences, McMaster University  
1400 Main St. West. IAHS – 403. Hamilton, ON. L8S4L8

Joy C MacDermid, PhD  
Professor  
School of Rehabilitation Science  
Faculty of Health Sciences, McMaster University  
1400 Main St. West. IAHS – 429. Hamilton, ON. L8S4L8

Seanne Wilkins, PhD  
Associate Professor  
School of Rehabilitation Science  
Faculty of Health Sciences, McMaster University  
1400 Main St. West. IAHS – 446. Hamilton, ON. L8S4L8

Jane Gibson, MCIsc (Speech Pathology)  
Director, Knowledge Translation  
Institute for Work & Health  
800- 481 University Avenue  
Toronto, Ontario M5G 2E9

Lynn Shaw, PhD  
Assistant Professor  
Faculty of health sciences, School of Occupational therapy  
University of Western Ontario  
1151 Richmond Street, London, Ontario, Canada, N6A 3K7

**Corresponding Author and name and address of the author to who requests for reprints should be addressed**

Lubna Daraz, PhD  
School of Rehabilitation Science  
Faculty of Health Sciences, McMaster University  
1400 Main St. West. IAHS – 403. Hamilton, ON. L8S4L8  
Phone: 905-916-0304  
Email: [darazl@mcmaster.ca](mailto:darazl@mcmaster.ca), [lubna.daraz@gmail.com](mailto:lubna.daraz@gmail.com)

1  
2  
3 **Word counts:** 3847  
4

5  
6 **Contributorship statement:**  
7

8 The first author, Dr. Daraz was in charge of all aspects of the research including choosing the  
9 topic, formulating research questions, reviewing literature, designing study, searching on  
10 Google, collecting data, evaluating websites, **drafting and revising manuscript critically for**  
11 **important intellectual content and provided final approval of the version to be published.** Dr.  
12 **MacDermid was involved in substantial contributions to conception and design, evaluating**  
13 **websites, revising manuscript critically for important intellectual content and provided final**  
14 **approval of the version to be published.** Dr. Wilkins and Ms. Gibson were involved in **substantial**  
15 **contributions to conception and design, evaluating websites and revising manuscript critically for**  
16 **important intellectual content and provided final approval of the version to be published.** Dr.  
17 Shaw was involved in **substantial contributions to conception and design, revising manuscript**  
18 **critically for important intellectual content and provided final approval of the version to be**  
19 **published.**  
20  
21  
22  
23  
24  
25  
26  
27  
28  
29  
30  
31  
32  
33  
34  
35  
36  
37  
38  
39  
40  
41  
42  
43  
44  
45  
46  
47  
48  
49  
50  
51  
52  
53  
54  
55  
56  
57  
58  
59  
60

## Abstract

### Background

People living with fibromyalgia strongly prefer to access health information from the Web. However, the majority of the people in previous studies strongly expressed their concerns about the quality of online information resources.

### Objectives

The purpose of this study was to evaluate existing online fibromyalgia information resources for content, quality and readability by using standardized quality and readability tools.

### Methods

The first 25 websites were identified using 'Google' and search keyword 'fibromyalgia'. Pairs of raters made independent evaluations of website quality using two structured tools (DISCERN and a Quality Checklist). Readability was assessed using the Flesch Reading Ease score maps.

### Results

Ranking of the websites' quality varied by the tools used, although there was general agreement about the "top" three websites (Fibromyalgia Information, Fibromyalgia Information Foundation and National Institute of Arthritis and Musculoskeletal and Skin Diseases). Content analysis indicated that 72% websites provided information on treatment options, 68% on symptoms, 60% on diagnosis and 40% on coping and resources. DISCERN ratings classified 32% websites as 'very good', 32% as 'good' and 36% as 'marginal'. The mean overall DISCERN score was 36.88 (good). Only 16 % of websites met the recommended grade of 6 to 8 literacy level (Range 7 – 15).

### Conclusion

Higher quality websites tended to be less readable. Online fibromyalgia information resources do not provide comprehensive information about fibromyalgia; have low quality and poor readability. While information is critical to living with fibromyalgia, current resources are unlikely to provide necessary or accurate information; and may not be usable for people.

### Article Summary

#### Article focus

- The purpose of the study was to gain a better understanding of the online information resources that are available for people living with fibromyalgia and to evaluate those information resources for content, quality and readability.

- What are the content, website quality and readability of the most readily retrieved information available on the web when searching for fibromyalgia information?

#### Key messages

- Majority of the existing websites do not provide comprehensive information on fibromyalgia
- Websites are highly variable in terms of quality
- Higher quality websites do not present information in language/reading levels appropriate for the general population

#### Strengths and limitations of this study

- This study provides the evidence of the quality of the majority of existing online fibromyalgia resources
- Standardized quality and readability tools were used to assess quality and readability
- There is no gold standard for comparison or ways to evaluate the quality of websites.
- The quality issue was discussed using the lens of critical appraisal tools designed for the lay public.
- Readability score may vary for some websites as it may be related to the use of technical terms such as fibromyalgia.

## INTRODUCTION

There are more than 70,000 web sites that offer health information for consumers and the number is growing everyday.<sup>1</sup> Many of these websites are accessed by people with fibromyalgia to self-manage their health. However, it is unknown if websites are consistent with the literacy and health needs of users such as persons with fibromyalgia. What we currently know is that web-based information has the potential to educate and empower consumers by providing information on the nature of their health problems and by helping to make informed decisions about their health.<sup>2,3,4,5</sup>

The extent of interest in web based health information is indicated by high and increasing usage.<sup>6,7</sup> In Canada about 8.7 million Canadians use the Internet to search for medical and health-related information. Among these people, women are more likely to search for health information about specific diseases than men.<sup>6</sup> In addition, 54% - 79% of those seeking information expressed concerns about the quality of online health information.<sup>6</sup> Similarly, in the USA, the number of adults who go online for health information has increased from 46% in 2000 to 61% in 2009.<sup>7</sup> Many (66%) of these online health information seekers discuss their concern about the lack of quality of online health information sources with their healthcare providers.<sup>7</sup> Thus, researchers at the Pew Internet and American Life Project anticipate that the more people access the Internet for health information, their concern for the quality will also continue to grow.<sup>7</sup>

The Internet is now an important resource for people living with fibromyalgia.<sup>8,9,10</sup> Fibromyalgia, is described as an invisible chronic condition that has severe impacts on health and quality of life for people who are living with the illness.<sup>11,12,13</sup> This disease manifests itself as chronic widespread musculoskeletal pain in different areas of the body.<sup>14,15,16</sup> The need for information is greater due to the controversy surrounding the condition which includes a lack of specific diagnostics tests and evidence-based treatment guidelines. It has been suggested that people are often left on their own to manage their illness.<sup>17,16</sup>

Daraz and others studied the information needs and preferences of people living with fibromyalgia.<sup>8,9</sup> The majority of the people in those studies expressed their preference of the web as a major source for accessing fibromyalgia-related information. However, they also strongly expressed their concerns about the lack of availability of types of information about fibromyalgia (content), need for evidence-based information (quality) and difficulty in understanding medical or technical terminologies (literacy/readability). A similar study by Crooks demonstrated that people living with fibromyalgia like to go online to access information about fibromyalgia to inform themselves about the illness and to assist with shared decision making with their healthcare providers.<sup>10</sup> However, the perceived lack of quality of online information was a major factor that was also discussed in the study findings. Others have also suggested that web-based health information can increase people's perception of control, improve their ability to cope with the illness, enhance their self-care abilities, and improve their quality of life by decreasing anxiety, fear and distress while increasing hope.<sup>18,19</sup> A number of studies have evaluated the quality of online health information designed for specific populations and found it to be of variable quality.<sup>20,21,22,23,24,25,2,26</sup> It is imperative that people living with fibromyalgia have

1  
2  
3 access to quality evidence-based information to help them live with their illness since it is a  
4 chronic disease. Therefore, it is important to evaluate if the information on websites can meet the  
5 needs of persons with fibromyalgia for accessible, high quality, useful information.  
6  
7

8 The purpose of this study was to gain a better understanding of the online  
9 information resources that are available for people living with fibromyalgia and to evaluate  
10 those information resources for content, quality and readability.  
11

## 12 13 **METHODS**

14  
15 This study was comprised of a keyword search, selecting websites and structured appraisal of the  
16 websites using **standardized** quality and readability tools. Similar methods were used by others  
17 who evaluated the quality of websites for specific conditions.<sup>20, 21, 24</sup>  
18  
19

### 20 21 **Search strategies to find online fibromyalgia information resources**

22 In a previous study, the authors identified search terms and engines that women commonly used  
23 when looking for information on fibromyalgia.<sup>8</sup> Based on those findings we performed a  
24 keyword search on 'Google' (www.google.com) with a keyword 'Fibromyalgia' on December  
25 11, 2009 to identify online resources about fibromyalgia that are most likely to be accessed by  
26 people. It has been suggested that lay people seldom search for information beyond the first 20  
27 links retrieved by a search engine so we used this to dictate our website sample.<sup>27</sup>  
28  
29

### 30 31 **Criteria for selecting online fibromyalgia information resources**

32 Our inclusion criteria for selecting websites were: 1) provide information on fibromyalgia, 2)  
33 provide information for consumers/patients and for their caregivers, and 3) provide information  
34 in English. We excluded duplicate websites or sites with dead links.  
35  
36  
37

### 38 39 **Quality appraisal tools**

40 DISCERN is a reliable and valid instrument that is used to assess the quality of written consumer  
41 health information which people can use without content expertise.<sup>28,29</sup> The instrument was  
42 developed and evaluated by an expert panel and a group of health information providers and self-  
43 help members. DISCERN consists of 15 questions (first 8 questions are for publication reliability  
44 and last 7 questions are for the quality of information on treatment choices) where each question  
45 is rated on a 1 to 5 point scale. We assigned scores using the score specified by DISCERN  
46 (Topic Addressed = 5, Partially addressed = 3, Not addressed = 1). This instrument has been  
47 evaluated for reliability and validity and is being used by many researchers to assess the quality  
48 of online health information for specific kinds of diseases.<sup>20, 23, 24</sup> However, DISCERN does not  
49 include many of the criteria that are important for assessing the content of specific information  
50 and for the development and dissemination process to distribute the information, for example,  
51 *accuracy, completeness, disclosure and readability.*<sup>27</sup>  
52  
53  
54  
55  
56  
57  
58  
59  
60

As a result, we used a Quality Checklist developed by Daraz and others<sup>30</sup> to assess the quality of web health information. This tool was developed based on a structured review and appraisal of existing web health evaluation tools that were developed to assess the quality of web health information. Based on their review, the authors determined that the existing web health evaluation tools did not meet the criteria for readability and ease of use for general consumers. As a result, they recommended a customized tool / quality checklist designed for general consumers' use. The Quality Checklist consists of 7 categories: 1) Authorship, 2) Content, 3) Currency, 4) Usefulness, 5) Disclosure, 6) User Support and Feedback, and 7) Privacy and Confidentiality. A total of 10 questions are included in the checklist with a 'yes' or 'no' option.

To determine the overall rating of the websites, we also used the total DISCERN score to categorize the websites as excellent (61-75), very good (60-46), good (45-31), marginal (30-16) and poor (15-1). It was not possible to assign similar categories to assess the overall rating of the websites using the Quality Checklist as the tool does not have a numerical scoring scheme like DISCERN.

For the readability evaluation, the information from each websites was evaluated for i) reading ease and ii) grade level calculation using the actual content from the websites. For the reading ease calculation we used "The Flesch Reading Ease (RE)"<sup>31, 32</sup> score maps that were designed to measure the readability of texts. The RE index is 0 to 100. An RE of around 60 to 70 is equivalent to a grade level of 6 to 8. The closer to 100 the text scores, the easier it is to read.<sup>31, 33</sup>

|         |             |         |                  |
|---------|-------------|---------|------------------|
| 90 -100 | Very easy   | 50 - 59 | Fairly difficult |
| 80 - 89 | Easy        | 30 - 49 | Difficult        |
| 70 - 79 | Fairly easy | 0 - 29  | Very confusing   |
| 60 - 69 | Standard    |         |                  |

For grade level calculation we used "The Flesch-Kincaid Grade Level" formula. It is recommended that anyone who aims to provide health information should try to achieve a grade level of 6 to 8. The scores using the 'Flesch Reading Ease' formula can be interpreted in the following format.<sup>31, 32</sup>

## DATA EXTRACTION AND ANALYSIS

High quality information exists when the information on websites is consistent with the best research; high quality websites are those which have certain standards for how they are produced.<sup>34, 20, 35</sup> By 'content' we refer to specific information about fibromyalgia addressed: for example, treatment, diet, finding specialists etc; and by 'readability' we refer to reading ease and grade level. By 'quality' we refer to overall website quality, not the analysis of specific pieces of information on the website. Rather, website quality looks at the extent to which efforts were made to insure the information on the website is current and accurate based on current evidence/knowledge.



1  
2  
3  
4  
5  
6  
7  
8  
9  
10  
11  
12  
13  
A data extraction tool was devised to allow reviewers to categorize the content contained on fibromyalgia websites. Categories were developed using concepts derived from both qualitative and quantitative research<sup>8,9</sup>; open-ended categories were later classified if concepts were reported that were not preconceived by the structured items. The data extraction table included: *country of origin*, *target audience*, *category of websites* and *types of content*. Websites were categorized as not-for-profit (e.g., societies, association, charitable, support group), commercial (e.g., private medical site, sponsored site), media (e.g., newspapers), and institutional (e.g., university or government).

14  
15  
16  
17  
18  
19  
20  
21  
22  
23  
24  
25  
26  
27  
28  
29  
30  
31  
32  
33  
34  
35  
36  
37  
38  
39  
40  
41  
42  
43  
44  
45  
46  
47  
48  
49  
50  
51  
52  
53  
54  
55  
56  
57  
58  
59  
60  
To assess reliability of evaluation, each site was independently rated by the authors. Although kappa scores were not tabulated, the reviewers extensively discussed each question where scoring was different and they continued until the scoring conflicts were resolved. We used simple descriptive statistics to analyze the data. SPSS version 18<sup>1</sup> was used in our analysis for calculating frequencies and cross-tabulations. For example, frequency command was used to determine the percentiles of websites for country of origin or to determine the categories of websites.

## RESULTS

Google retrieved 6,720,000 results for the keyword search. Among these, the first 25 websites were selected for analysis (Table 1). The country of origin for thirteen (52%) of the websites was USA, eight (32%) were from Canada, one from UK and the rest had no country specified (Table 1). The category of websites varied. Ten (40%) were not-for-profit organizations, six (24%) were commercial, five (20%) were media, and four (16%) were institutional. Only five (20%) websites were dedicated to women. Table 1 also demonstrates scores for DISCERN (column 3) and percentage for 'yes' option only for the Quality Checklist (column 4).

Figure 1 shows the types of information provided by selected websites. In addition to these kinds there were other types of information available on the selected websites, such as complications (8%), controversies (8%), exercise (8%), lifestyle guide (8%), education (4%), employment (4%), psychological issues (4%), quality of life (4%) and self-help (4%)

Figure 1. Types of information available on selected websites

---

<sup>1</sup> <http://www.spss.com/>

Table 1: 25 Selected sites and their overall scores

| Website url                                                                                                                            | Developer Origin                                                                             | DISCERN Score - 75 | Quality Checklist % (Yes) | Readability (Grade level) |
|----------------------------------------------------------------------------------------------------------------------------------------|----------------------------------------------------------------------------------------------|--------------------|---------------------------|---------------------------|
| Fibromyalgia Treatment Center <sup>36</sup><br><a href="http://www.fibromyaliatreatment.com/">http://www.fibromyaliatreatment.com/</a> | Fibromyalgia Treatment Center, Inc/USA                                                       | 22                 | 80                        | 7                         |
| Fibromyalgia Network <sup>37</sup><br><a href="http://www.fmnetnews.com/">http://www.fmnetnews.com/</a>                                | Not specified/USA                                                                            | 38                 | 60                        | 8                         |
| Medline Plus <sup>38</sup><br><a href="http://www.nlm.nih.gov/medlineplus">http://www.nlm.nih.gov/medlineplus</a>                      | National Library of Medicine and National Institutes of Health /USA                          | 40                 | 80                        | 8                         |
| Women's Health Matters <sup>39</sup><br><a href="http://www.womenshealthmatters.ca">http://www.womenshealthmatters.ca</a>              | Women's College Hospital and the Women's College Research Institute /Canada                  | 46                 | 80                        | 8                         |
| Body and Health <sup>40</sup><br><a href="http://bodyandhealth.canada.com">http://bodyandhealth.canada.com</a>                         | MediResource /Canada                                                                         | 27                 | 30                        | 9                         |
| The Environmental Illness Resource <sup>41</sup><br><a href="http://www.ei-resource.org/">http://www.ei-resource.org/</a>              | Matthew Hogg /UK                                                                             | 32                 | 70                        | 9                         |
| Fibromyalgia Support <sup>42</sup><br><a href="http://www.fibromyalgia-support.org">http://www.fibromyalgia-support.org</a>            | Global Healing Center /USA                                                                   | 28                 | 90                        | 9                         |
| FM-CFS Canada <sup>43</sup><br><a href="http://fm-cfs.ca/fm.html">http://fm-cfs.ca/fm.html</a>                                         | FM-CFS Canada /Canada                                                                        | 55                 | 80                        | 9                         |
| Wikipedia, the free encyclopedia<br><a href="http://en.wikipedia.org">http://en.wikipedia.org</a> <sup>44</sup>                        | Wikimedia Foundation, Inc./USA                                                               | 40                 | 80                        | 10                        |
| Canadian Women's Health Network <sup>45</sup><br><a href="http://www.cwhn.ca">http://www.cwhn.ca</a>                                   | The Canadian Women's Health Network and the Centres of Excellence for Women's Health /Canada | 34                 | 60                        | 10                        |
| MedicineNet.com <sup>46</sup><br><a href="http://www.medicinenet.com">http://www.medicinenet.com</a>                                   | MedicineNet, Inc./USA                                                                        | 45                 | 80                        | 10                        |
| Fibromyalgia Symptoms <sup>47</sup><br><a href="http://www.fibromyaliasympptoms.org/">http://www.fibromyaliasympptoms.org/</a>         | Not specified                                                                                | 46                 | 40                        | 10                        |

|    |                                                                                              |                                                                            |    |     |    |
|----|----------------------------------------------------------------------------------------------|----------------------------------------------------------------------------|----|-----|----|
| 1  |                                                                                              |                                                                            |    |     |    |
| 2  |                                                                                              |                                                                            |    |     |    |
| 3  | About.com <sup>48</sup>                                                                      | The New York Times Company/USA                                             | 46 | 90  | 10 |
| 4  | <a href="http://chronicfatigue.about.com">http://chronicfatigue.about.com</a>                |                                                                            |    |     |    |
| 5  |                                                                                              |                                                                            |    |     |    |
| 6  | Women and Fibromyalgia <sup>49</sup>                                                         | Book written by Barbara Keddy/Canada                                       | 23 | 60  | 10 |
| 7  | <a href="http://womenandfibromyalgia.com/">http://womenandfibromyalgia.com/</a>              |                                                                            |    |     |    |
| 8  |                                                                                              |                                                                            |    |     |    |
| 9  | National Fibromyalgia Partnership <sup>50</sup>                                              | The National Fibromyalgia Partnership, Inc/ not specified                  | 50 | 60  | 10 |
| 10 | <a href="http://www.fmpartnership.org/">http://www.fmpartnership.org/</a>                    |                                                                            |    |     |    |
| 11 |                                                                                              |                                                                            |    |     |    |
| 12 | Fibromyalgia Chronic Fatigue <sup>51</sup>                                                   | Clymer Healing Center /USA                                                 | 21 | 50  | 10 |
| 13 | <a href="http://www.chronicfatigue.org/">http://www.chronicfatigue.org/</a>                  |                                                                            |    |     |    |
| 14 |                                                                                              |                                                                            |    |     |    |
| 15 | Autoimmunity Research Foundation <sup>52</sup>                                               | Autoimmunity Research Foundation /USA                                      | 24 | 70  | 11 |
| 16 | <a href="http://bacteriality.com">http://bacteriality.com</a>                                |                                                                            |    |     |    |
| 17 |                                                                                              |                                                                            |    |     |    |
| 18 | Fibromyalgia Information <sup>53</sup>                                                       | Woman to Woman Computing/Canada                                            | 52 | 90  | 11 |
| 19 | <a href="http://fibromyalgia.ncf.ca/">http://fibromyalgia.ncf.ca/</a>                        |                                                                            |    |     |    |
| 20 |                                                                                              |                                                                            |    |     |    |
| 21 | Ontario Fibromyalgia Association <sup>54</sup>                                               | Not specified/Canada                                                       | 23 | 40  | 11 |
| 22 | <a href="http://www.hwcn.org/~aq226/">http://www.hwcn.org/~aq226/</a> ( no longer activated) |                                                                            |    |     |    |
| 23 |                                                                                              |                                                                            |    |     |    |
| 24 | NIAMSD <sup>55</sup>                                                                         | National Institute of Arthritis and Musculoskeletal and Skin Diseases /USA | 49 | 100 | 11 |
| 25 | <a href="http://www.niams.nih.gov">http://www.niams.nih.gov</a>                              |                                                                            |    |     |    |
| 26 |                                                                                              |                                                                            |    |     |    |
| 27 | Fibromyalgia Information Foundation <sup>56</sup>                                            | Oregon Health & Science University/USA                                     | 51 | 90  | 11 |
| 28 | <a href="http://www.myalgia.com/">http://www.myalgia.com/</a>                                |                                                                            |    |     |    |
| 29 |                                                                                              |                                                                            |    |     |    |
| 30 | Fibro Hugs <sup>57</sup>                                                                     | Ken Euteneier / not specified                                              | 16 | 40  | 12 |
| 31 | <a href="http://fibrohugs.com/">http://fibrohugs.com/</a>                                    |                                                                            |    |     |    |
| 32 |                                                                                              |                                                                            |    |     |    |
| 33 | Mayo Clinic <sup>58</sup>                                                                    | Mayo Foundation for Medical Education and Research/USA                     | 45 | 90  | 13 |
| 34 | <a href="http://mayoclinic.com/">http://mayoclinic.com/</a>                                  |                                                                            |    |     |    |
| 35 |                                                                                              |                                                                            |    |     |    |
| 36 | BC fibromyalgia Society <sup>59</sup>                                                        | MEFM Societies of BC /Canada                                               | 28 | 70  | 13 |
| 37 | <a href="http://www.mefm.bc.ca">http://www.mefm.bc.ca</a>                                    |                                                                            |    |     |    |
| 38 |                                                                                              |                                                                            |    |     |    |
| 39 | Neurology channel <sup>60</sup>                                                              | Healthcommunities.com, Inc. /USA                                           | 41 | 80  | 15 |
| 40 | <a href="http://www.neurologychannel.com">http://www.neurologychannel.com</a>                |                                                                            |    |     |    |
| 41 |                                                                                              |                                                                            |    |     |    |

Note: List based on lower to highest readability scores

1  
2  
3  
4 Figure 2 demonstrates websites reliability and quality of treatment information as  
5 measured by DISCERN. The mean score of all 15 questions combined was 2.49 out of 5. No  
6 question received a mean score of 4 or more. The questions that received the lowest score were  
7 related to sources of information, areas of uncertainty, side effects of treatments, effects of no  
8 treatment, effect on quality of life and shared decision-making. According to the DISCERN  
9 score, websites were also categorized as very good (32%), good (32%) and marginal (36%). The  
10 mean overall DISCERN score was 36.88 (good).  
11  
12

13 Figure 3 shows the combined Quality Checklist scores for the websites. The questions  
14 that received highest rating were contact information, confidentiality, ownership and useable  
15 /understandable.  
16  
17

18  
19 Figure 2. Combined scores of the DISCERN reliability and quality of treatment information  
20  
21

22 Figure 3. Combined scores of the Quality Checklist questions (percentage of option 'yes')  
23  
24

25 The readability test showed that the reading level for fourteen (56%) websites was  
26 between grades 10 to 12, seven websites (28%) between grades 8 to 9, and one website (4%)  
27 between grades 6 to 7. Twelve percent were college level and none scored for grade 1 to 5 (Table  
28 1).  
29

30 Table 2 shows five highest ranked websites according to scores from DISCERN, Quality  
31 Checklist and Flesch Reading Ease.  
32  
33  
34  
35  
36  
37  
38  
39  
40  
41  
42  
43  
44  
45  
46  
47  
48  
49  
50  
51  
52  
53  
54  
55  
56  
57  
58  
59  
60

Table 2. Five top ranked websites based on DISCERN, Quality Checklist and The Flesch Reading Ease scores

| Tool                | Website                                                                                                                                                                                                                                                                                 |
|---------------------|-----------------------------------------------------------------------------------------------------------------------------------------------------------------------------------------------------------------------------------------------------------------------------------------|
| DISCERN             | <ol style="list-style-type: none"> <li>1. FM-CFS Canada</li> <li>2. Fibromyalgia Information</li> <li>3. Fibromyalgia Information Foundation</li> <li>4. National Fibromyalgia Partnership</li> <li>5. National Institute of Arthritis and Musculoskeletal and Skin Diseases</li> </ol> |
| Quality Checklist   | <ol style="list-style-type: none"> <li>1. National Institute of Arthritis and Musculoskeletal and Skin Diseases</li> <li>2. Fibromyalgia Support</li> <li>3. About.com</li> <li>4. Fibromyalgia Information</li> <li>5. Fibromyalgia Information Foundation</li> </ol>                  |
| Flesch Reading Ease | <ol style="list-style-type: none"> <li>1. Fibromyalgia Treatment Center</li> <li>2. Fibromyalgia Network</li> <li>3. Medline Plus</li> <li>4. Women's Health Matters</li> <li>5. Body and Health</li> </ol>                                                                             |

## DISCUSSION

The results of this study suggest that fibromyalgia websites vary with respect to content, quality and readability. There is considerable variability between the average scores from DISCERN, the Quality Checklist and the Flesch Reading Ease. In cases where the quality of websites was good readability was often poor. There are only three websites: Fibromyalgia Information<sup>53</sup>, Fibromyalgia Information Foundation<sup>56</sup> and National Institute of Arthritis and Musculoskeletal and Skin Diseases<sup>55</sup> that consistently rated with higher levels of quality (Table 1). Unfortunately, since these had high reading levels (Grade 11), they are not likely to be accessible by people with lower literacy.

Most commonly the content of websites addressed symptoms, treatment, and diagnosis. Many websites lacked information about important topics that patients have identified as significant such as causes of fibromyalgia, research, supports, alternative therapies, impact, and specialists that might help them understand and manage an illness.<sup>8,9,61</sup> As a result, people looking for these types of information on the web will find little on these aspects of information on fibromyalgia. More efforts are needed to include comprehensive information on the websites that provide customized information for people with fibromyalgia.

Websites quality scoring between the two quality appraisal tools resulted in different rankings. This can be attributed to having different items and scoring. Others have shown that there is considerable variability in the critical appraisal tools used for evaluating research<sup>34</sup> and it appears that a similar trend is evolving with respect to websites. While DISCERN seems to be most commonly used currently in the literature, it is important for those conducting reviews to evaluate whether the critical appraisal tool is most appropriate for their individual study.

This study focused on assessing the quality of a website from the perspective of a lay person.<sup>26,23</sup> Lay 'quality' assessments assumes practices that indicate more rigorous development and authorship will lead to more timely and accurate information. That is because the general public cannot be assigned the task of verifying the accuracy of specific medical or scientific information on the website. This study indicates websites do not adequately identify the sources of information that are provided on the websites nor the timeliness of posted information. It has been suggested that providing a date does not necessarily mean that the information is correct or up-to-date.<sup>2</sup> However, when asking the lay public to assess information currency, this is a reasonable proxy. The true assessment of website currency would be to track down whether recent evidence was incorporated. This is not a reasonable expectation for the lay public. Similarly, providing contact information is thought to be associated with authors who take responsibility for information provided on their website, but a variety of motivations may be behind what specific elements are added to websites. This study focused on assessment of website quality from the perspective of the consumer. We also observed that two different tools (DISCERN and the Quality Checklist) designed for the lay public provided different scores and rankings. We have no way of knowing whether one tool provided a more valid assessment than the other. However, both scales agreed on 3 (Fibromyalgia Information<sup>53</sup>, Fibromyalgia Information Foundation<sup>56</sup> and National Institute of Arthritis and Musculoskeletal and Skin Diseases<sup>55</sup>) out of 5 websites that placed in the top 5 websites list (Table 2) suggesting a level of concurrent validity. Studies that assess the extent to which different lay indicators of quality are

1  
2  
3 associated with actual quality and accuracy of information are needed to assess the criterion  
4 validity of these scales.  
5  
6

7 This review demonstrates that a substantial proportion of the most accessible websites  
8 that are fibromyalgia information resources do not meet the criteria established for website  
9 quality undermining the confidence that users can place in the accuracy of the information  
10 contained within these resources. More attention is needed from healthcare providers and  
11 websites developers so that they can work together to provide more consistent information for  
12 people living with fibromyalgia. There is also a need to determine which criterion can be most  
13 useful and accurate for lay individuals to assess website quality. For example, none of the tools  
14 used for this study are able to assess websites for accessibility, linking, peer to peer feedback or  
15 web standards.  
16  
17

18  
19 Another major finding of this review is that people need a high level of education to  
20 understand online information on fibromyalgia particularly on high quality websites. For  
21 example, the National Institute of Arthritis and Musculoskeletal and Skin Diseases website  
22 provides good quality information about fibromyalgia; however, a person with fibromyalgia  
23 needs a grade level of II to understand and to use that information. Only four (Fibromyalgia  
24 Treatment Center<sup>36</sup>, Fibromyalgia Network<sup>37</sup>, Medline Plus<sup>38</sup>, Women's Health Matters<sup>39</sup>) of the  
25 websites meet the literacy level for the general population. "High readability requirements  
26 decrease information accessibility and potentially exclude users with low literacy skills".<sup>62</sup> Using  
27 the web to provide useable quality information remains elusive. A common concern among  
28 people living with chronic illnesses including people with fibromyalgia is that difficult medical  
29 terminology is a major barrier for them to access and use online health information efficiently.<sup>8, 9,  
30 20, 63</sup> Online information on fibromyalgia needs to be written at or below a grade 8 level so that  
31 all people are able to read the information and use it to participate in their own health decision-  
32 making. This suggests that people with health literacy expertise should be involved in website  
33 development.  
34  
35  
36

37  
38 Overall, there is evidence that there are inconsistencies across websites for providing  
39 information on content, overall quality and readability which are consistent with others who  
40 evaluated websites for other chronic conditions.<sup>2, 26</sup> People living with fibromyalgia have  
41 expressed a strong need for information and a dependency on web-based information as a  
42 primary source. This indicates that more effort is needed to ensure that the information provided  
43 on fibromyalgia websites meets the information needs, quality and suggested readability criteria.  
44  
45

## 46 LIMITATIONS OF THE STUDY

47  
48  
49 A number of limitations should be considered when interpreting our results. First, our search was  
50 not comprehensive as we only used 'Google' and one keyword to search for online fibromyalgia  
51 resources. We selected Google and "fibromyalgia" as these were most commonly used by our  
52 target audience<sup>8</sup>, but recognized that other search engines and combination of multiple key words  
53 may have produced different results.  
54  
55

56 Some limitations are noted by the way that items on the Quality Checklist are formatted.  
57 Since some items have multiple questions that required a single yes/ no answer, reviewers  
58  
59  
60



1  
2  
3 sometimes had difficulty selecting an option when partial credit was assigned. In addition, there  
4 is lack of evidence available to validate the Quality Checklist. Thus some of the differences  
5 between DISCERN and the Quality Checklist relate to scoring methods. Finally, we have no  
6 gold standard for whether these websites were quality websites. We addressed the quality issue  
7 using the lens of two critical appraisal tools designed for the lay public. Some of the other  
8 important criteria such as accessibility, linking, web standards or peer to peer feedback are not  
9 included in the quality tools that we used. As a result, a review that perform a detailed analysis of  
10 recommendations on the website and determine whether they are consistent with the highest  
11 quality evidence would have determined if the information itself was high quality. Finally, the  
12 readability score may vary for some websites as it may be related to the use of technical terms  
13 such as fibromyalgia, since this seems to be a word that might rank low in the readability  
14 calculation.  
15  
16  
17  
18

## 19 CONCLUSION AND IMPLICATIONS FOR PRACTICE

21 The Internet is changing the way that people gather information about dealing with chronic  
22 conditions like fibromyalgia and has the potential to facilitate disease 'self-management'. This  
23 study has demonstrated that the existing online fibromyalgia resources do not provide  
24 comprehensive information about fibromyalgia. The majority of the existing websites provide  
25 information on only a few content areas and websites are highly variable in terms of quality and  
26 readability. Ranking of the websites' quality varied by the tools used, although there was general  
27 agreement about the "top" three websites. Higher quality websites do not present information in  
28 language/reading levels appropriate for the general population. Thus, it is difficult for people  
29 living with fibromyalgia to distinguish between 'good' and 'poor' online resources. This  
30 suggests that there is potential for misinformation when people with fibromyalgia access web-  
31 based health information. Healthcare and social service providers need to be aware of this state  
32 of online fibromyalgia resources so that they are able to provide better services to people with  
33 fibromyalgia. Healthcare providers need to be more involved in the health decision-making for  
34 people with fibromyalgia by helping them access quality online health information.  
35  
36  
37  
38  
39

## 40 ACKNOWLEDGEMENT

42 This work was supported from a Doctoral Research Award (Frederick Banting and Charles Best  
43 Scholarship) from the CIHR; a Strategic Training Fellowship in Rehabilitation Research from  
44 the CIHR Musculoskeletal and Arthritis Institute; a S. Leonard Syme Training Fellowship from  
45 the Institute for Work & Health; and a MSK Training Fellowship from the Ontario Rehabilitation  
46 Research Advisory Network to Lubna Daraz.  
47  
48

49 **There are no competing interests.**

## 50 REFERENCES

- 51  
52  
53  
54 1. **Grandinetti** DA. Doctors and the Web: Help your patients surf the Net safely. *Med Econo*  
55 2000; 63(8) April: 28–34.  
56  
57  
58  
59  
60



- 1  
2  
3  
4  
5  
6  
7  
8  
9  
10  
11  
12  
13  
14  
15  
16  
17  
18  
19  
20  
21  
22  
23  
24  
25  
26  
27  
28  
29  
30  
31  
32  
33  
34  
35  
36  
37  
38  
39  
40  
41  
42  
43  
44  
45  
46  
47  
48  
49  
50  
51  
52  
53  
54  
55  
56  
57  
58  
59  
60
2. **Hoffman-Goetz L**, Clarke NJ. Quality of Breast Cancer Sites on the World Wide Web. *Can J Public Health*. 2000; 91 (4): 281-284.
3. **Sillence E**, Briggs P, Harris P, Fishwick L. Going online for health advice: Changes in usage and trust practices over the last five years. *Interac Comp* 2007; 19 (3): 397- 406.
4. **Campbell RJ**. Older women and the Internet. *J Women Aging*. 2004; 16 (1/2): 161-174
5. **Pandey S**, Hart J J, Tiwary S. Women's health and the internet: understanding emerging trends and implications. *Soc Sc Med* 2003; 56: 179-191.
6. **Statistics Canada**. Canadian Internet Use Survey (CIUS). <http://www.statcan.gc.ca/> (accessed 3 Feb 2011).
7. **Fox S**, Rainie L. The social life of health information. Pew Internet & American Life Project. 2009. [http://www.pewinternet.org/~media/Files/Reports/2009/PIP\\_Health\\_2009.pdf](http://www.pewinternet.org/~media/Files/Reports/2009/PIP_Health_2009.pdf) (accessed 4 Feb 2011).  
'Author. Title [dissertation]. Location: Institution; Year.'
8. **Daraz L**. Information availability and needs of people with Fibromyalgia [dissertation]. Chapter 2. Hamilton, ON, Canada: McMaster University; 2011.
9. **Daraz L**. Information availability and needs of people with Fibromyalgia [dissertation]. Chapter 3. Hamilton, ON, Canada: McMaster University; 2011.
10. **Crooks VA**. I go on the Internet; I always, you know, check to see what's new" chronically ill women's use of online health information to shape and inform doctor-patient interactions in the space of care provision. *ACME: An Interna E-J Critical Geo* 2006; 5(1): 50-69.
11. **Weir PT**, Harlan GA, Nkoy FL, Jones SS, Hegmann KT, Gren LH et al. The incidence of fibromyalgia and its associated comorbidities: a population-based retrospective cohort study based on international classification of diseases, 9th revision codes. *J Clin Rheumatol* 2006 Jun;12(3):124-8.
12. **Schaefer, KM**. The Lived Experience of Fibromyalgia in African American Women. *Holis Nurs Practice* 2005; 19(1): 17-25.
13. **Gunilla M**. Liedberg, Cris M. Henriksson. Factors of Importance for work disability in women with fibromyalgia: an interview study. *Arthritis Care Res* 2002; 47 (3): 266-274.
14. **Williams DA**, Clauw DJ. (2009). Understanding fibromyalgia: Lessons from the broader pain research community. *J of Pain* 2009; 10 (8):777-791.
15. **Neumann L**, Buskila D. Epidemiology of Fibromyalgia. *Current Pain Head Reports* 2003; 7:362-368.

16. **Lempp HK**, Hatch SL, Carville SF, Choy EC. (2009). Patients' experiences of living with and receiving treatment for fibromyalgia syndrome: a qualitative study. *BMC Musculos Dis* 2009; 10(124).
17. **Kool MB**, Middendorp HV, Boeije HR, Geenen R. Understanding the lack of understanding: invalidation from the perspective of the patient with fibromyalgia. *Arthr Rheum and Rheum* 2009; 15; 61(12):1650-6.
18. **Taylor LR**. Patients turn to Dr. Google for health information – good and bad. Journal staff. [http://www.rapidcityjournal.com/lifestyles/article\\_32d777ca-ec1e-11de-aab5-001cc4c03286.html](http://www.rapidcityjournal.com/lifestyles/article_32d777ca-ec1e-11de-aab5-001cc4c03286.html) (accessed 22 January 2011).
19. **Eysenbach G**, Kohler C. How do consumers search for and appraise health information on the World Wide Web? Qualitative study using focus groups, usability tests, and in-depth interviews. *BMJ* 2002; 324: 573-577.
20. **Thompson AE**, Graydon SL. Patient-oriented methotrexate information sites on the Internet: a review of completeness, accuracy, format, reliability, credibility, and readability. *J Rheum* 2009; 36 (1): 41-48.
21. **Hanif F**, Abayasekara K, Willcocks L, Jolly EC, Jamieson NV, Praseedom RK, et al. The quality of information about kidney transplantation on the World Wide Web. *Clinical Transpla* 2007; 21(3):371-6.
22. **Martin-Facklam M**, Kostrzewa M, Martin P, Haefeli WE. Quality of drug information on the World Wide Web and strategies to improve pages with poor information quality. An intervention study on pages about sildenafil. *Brit J Clinic Pharm* 2004;57(1):80-5.
23. **Khazaal Y**, Fernandez M A, Cochand S, Reboh I, Zullino D. (2008). Quality of web-based information on social phobia: a cross-sectional study. *Depres Anxiety* 2008; 25: 461-465.
24. **Hargrave DR**, Hargrave UA, Bouffet E. Quality of health information on the Internet in pediatric neuro-oncology. *Neuro-Oncol* 2006; 8(2): 175-182.
25. **Griffiths KM**, Christensen H. The quality and accessibility of Australian depression sites on the World Wide Web. *Medi J Australia* 2002; 176(10 Suppl):97-104.
26. **Al-Bahrani A**, Plusa S. The quality of patient-oriented internet information on colorectal cancer. *Color Disea* 2004; 6: 323-326.
27. **Eysenbach G**, Powell J, Kuss O, Sa ER. Empirical studies assessing the quality of health information for consumers on the World Wide Web. A systematic review. *JAMA* 2002; 287 (20).

- 1  
2  
3  
4  
5  
6  
7  
8  
9  
10  
11  
12  
13  
14  
15  
16  
17  
18  
19  
20  
21  
22  
23  
24  
25  
26  
27  
28  
29  
30  
31  
32  
33  
34  
35  
36  
37  
38  
39  
40  
41  
42  
43  
44  
45  
46  
47  
48  
49  
50  
51  
52  
53  
54  
55  
56  
57  
58  
59  
60
28. **Charnock D**, Shepperd S, Needham G, Gann R. DISCERN: an instrument for judging the quality of written consumer health information on treatment choices. *J Epidem Commu Health* 1999; 53:105–111.
  29. **Shepperd S**. DISCERN Online. Quality criteria for consumer health information. <http://www.discern.org.uk/> (accessed May 31, 2011).
  30. **Daraz L**, MacDermid JC, Wilkins S, Shaw S. Tools to Evaluate the Quality of Web Health Information: A Structured Review of Content and Usability. *Interna J Techn Knowle Soc* 2009; 5 (3).
  31. **Colman MA**. *Dictionary of Psychology*. Oxford University Press, 2001
  32. **The Flesch Reading Ease**. Readability Formulas.com. Free Readability Assessment. <http://www.readabilityformulas.com/free-readability-formula-assessment.php> (accessed 22 January 2011).
  33. **D’Alessandro DM**, Kingsley P, Johnson-West J. The readability of pediatric patient education materials on the World Wide Web. *Arch Pedia Adole Med* 2001; 155: 807-812
  34. **Katrak P**, Bialocerkowski EA, Massy-Westropp N, Kumar S, Grimmer AK. A systematic review of the content of critical appraisal tools. *BMC Med Res Metho* 2004, 4:22.
  35. **Jordan JE**, Osborne RH, Buchbinder R. Critical appraisal of health literacy indices revealed variable underlying constructs, narrow content and psychometric weaknesses. *J Clin Epidemiol* 2010 [Epub ahead of print]
  36. **Fibromyalgia Treatment Center**. <http://www.fibromyalgiatreatment.com/> (accessed 11 December 2009)
  37. **Fibromyalgia Network**. <http://www.fmnetnews.com/> (accessed 11 December 2009)
  38. **Medline Plus**. <http://www.nlm.nih.gov/medlineplus> (accessed 11 December 2009)
  39. **Women’s Health Matters**. <http://www.womenshealthmatters.ca>(accessed 11 December 2009)
  40. **Body and Health**. <http://bodyandhealth.canada.com> (accessed 11 December 2009)
  41. **The Environmental Illness Resource**. <http://www.ei-resource.org> (accessed 11 December 2009)
  42. **Fibromyalgia Support**. <http://www.fibromyalgia-support.org> (accessed 11 December 2009)
  43. **FM-CFS Canada**. <http://fm-cfs.ca/fm.html>(accessed 11 December 2009)

- 1
- 2
- 3
- 4 44. **Wikipedia, the free encyclopedia.** <http://en.wikipedia.org> (accessed 11 December 2009)
- 5
- 6 45. **Canadian Women's Health Network.** <http://www.cwhn.ca/> (accessed 11 December 2009)
- 7
- 8 46. **MedicineNet.com.** <http://www.medicinenet.com> (accessed 11 December 2009)
- 9
- 10 47. **Fibromyalgia Symptoms.** <http://www.fibromyalgiasymptoms.org/>(accessed 11 December
- 11 2009)
- 12
- 13
- 14 48. **About.com.** <http://chronicfatigue.about.com> (accessed 11 December 2009)
- 15
- 16 49. **Women and Fibromyalgia.** <http://www.myalgia.com/> (accessed 11 December 2009)
- 17
- 18
- 19 50. **National Fibromyalgia Partnership.** <http://www.fmpartnership.org/> (accessed 11
- 20 December 2009)
- 21
- 22 51. **Fibromyalgia Chronic Fatigue.** <http://www.chronicfatigue.org/> (accessed 11 December
- 23 2009)
- 24
- 25
- 26 52. **Autoimmunity Research Foundation.** <http://bacteriality.com>(accessed 11 December 2009)
- 27
- 28 53. **Fibromyalgia Information.** <http://fibromyalgia.ncf.ca/> (accessed 11 December 2009)
- 29
- 30 54. **Ontario Fibromyalgia Association.** <http://www.hwcn.org> (accessed 11 December 2009)
- 31
- 32
- 33 55. **National Institute of Arthritis and Musculoskeletal and Skin Diseases.** (NIAMSD)
- 34 <http://www.niams.nih.gov> (accessed 11 December 2009)
- 35
- 36 56. **Fibromyalgia Information Foundation.** <http://www.myalgia.com/> (accessed 11 December
- 37 2009)
- 38
- 39
- 40 57. **Fibro Hugs.** <http://fibrohugs.com/> (accessed 11 December 2009)
- 41
- 42 58. **Mayo Clinic.** <http://mayoclinic.com/> (accessed 11 December 2009)
- 43
- 44
- 45 59. **BC fibromyalgia Society.** <http://www.mefm.bc.ca>(accessed 11 December 2009)
- 46
- 47 60. **Neurology channel.** <http://www.neurologychannel.com> (accessed 11 December 2009)
- 48
- 49
- 50 61. **Murray E, Burns J, See Tai S, Lai R, Nazareth I.** Interactive Health Communication
- 51 Applications for people with chronic disease. *Cochr Data Syst Revi*2005; 4. Art. No.:
- 52 CD004274.
- 53
- 54 62. **Thomson MD, Hoffman-Goetz L.** Readability and cultural sensivity of web-based patient
- 55 decision aids for cancer screening and treatment: A systematic review. *Medi Inform Intern*
- 56 *Med* 2007; 32(4): 263-286
- 57
- 58
- 59
- 60

1  
2  
3  
4  
5  
6  
7  
8  
9  
10  
11  
12  
13  
14  
15  
16  
17  
18  
19  
20  
21  
22  
23  
24  
25  
26  
27  
28  
29  
30  
31  
32  
33  
34  
35  
36  
37  
38  
39  
40  
41  
42  
43  
44  
45  
46  
47  
48  
49  
50  
51  
52  
53  
54  
55  
56  
57  
58  
59  
60

For peer review only

1  
2  
3  
4  
5  
6  
7  
8  
9  
10  
11  
12  
13  
14  
15  
16  
17  
18  
19  
20  
21  
22  
23  
24  
25  
26  
27  
28  
29  
30  
31  
32  
33  
34  
35  
36  
37  
38  
39  
40  
41  
42  
43  
44  
45  
46  
47  
48  
49  
50  
51  
52  
53  
54  
55  
56  
57  
58  
59  
60

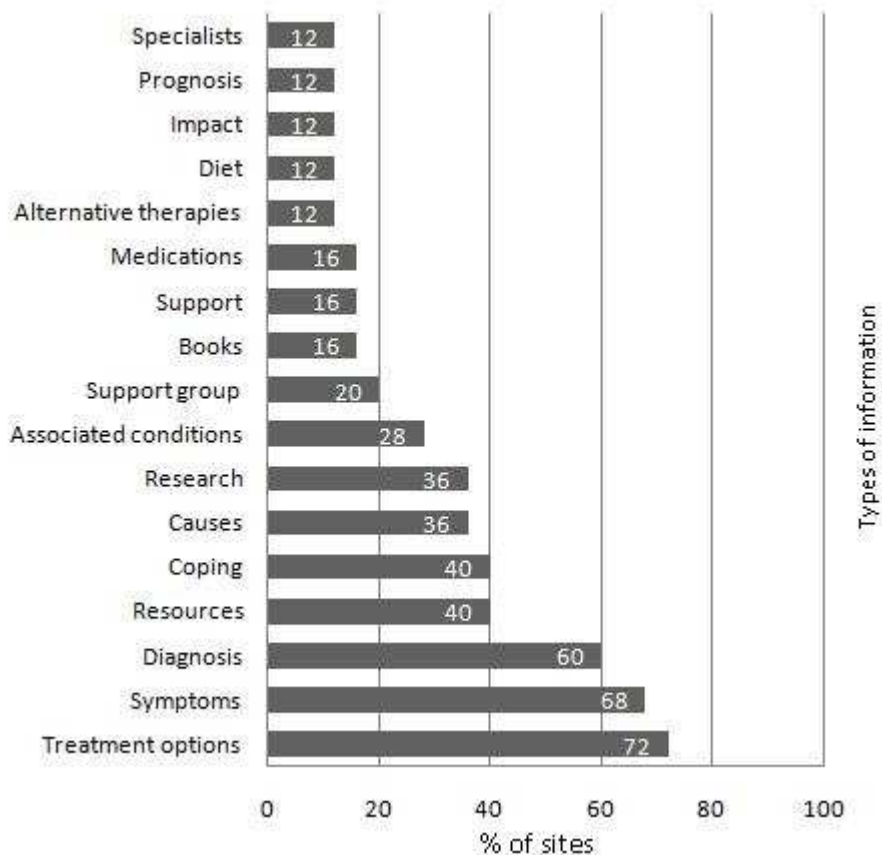

40x36mm (300 x 300 DPI)

For peer review only

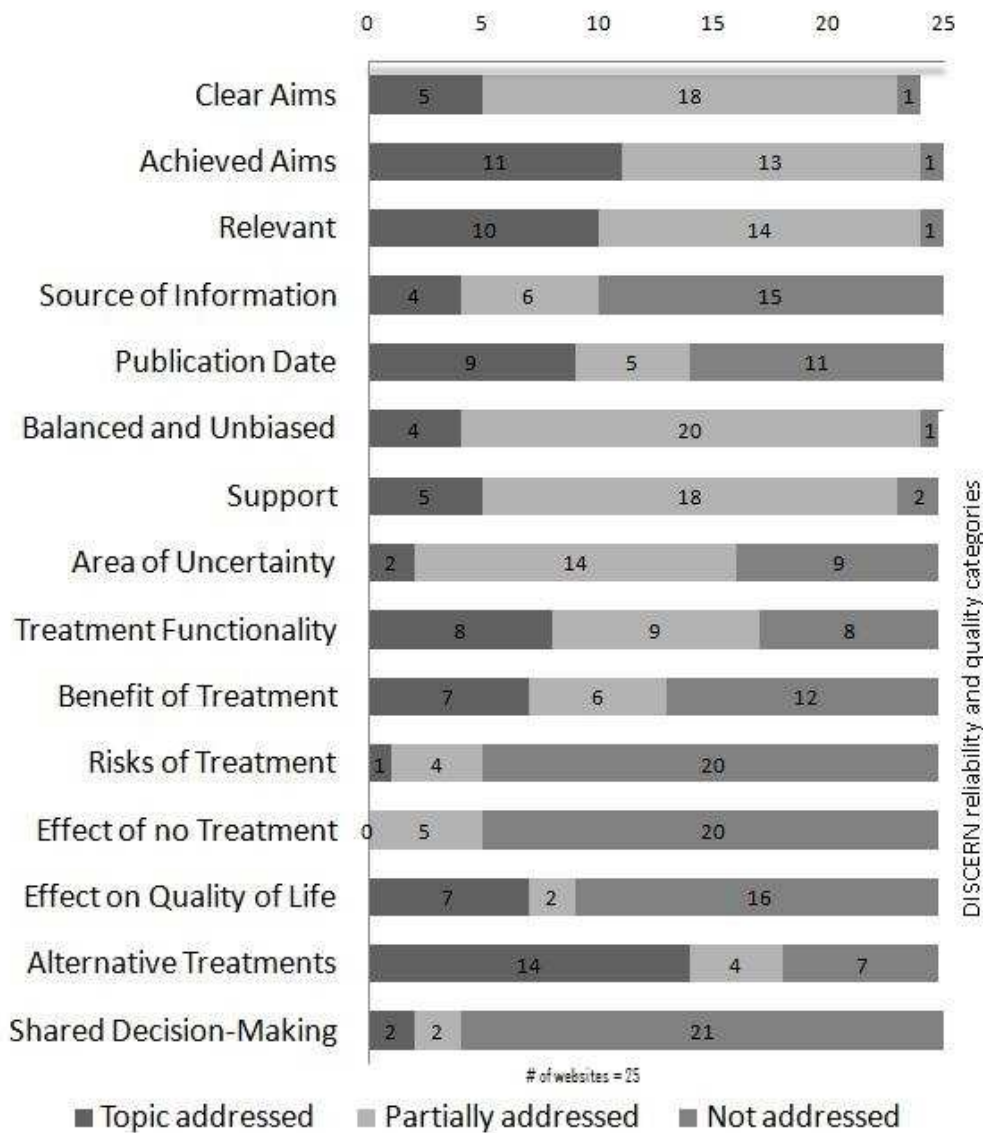

Combined scores of the DISCERN reliability and quality of treatment information  
47x55mm (300 x 300 DPI)

1  
2  
3  
4  
5  
6  
7  
8  
9  
10  
11  
12  
13  
14  
15  
16  
17  
18  
19  
20  
21  
22  
23  
24  
25  
26  
27  
28  
29  
30  
31  
32  
33  
34  
35  
36  
37  
38  
39  
40  
41  
42  
43  
44  
45  
46  
47  
48  
49  
50  
51  
52  
53  
54  
55  
56  
57  
58  
59  
60

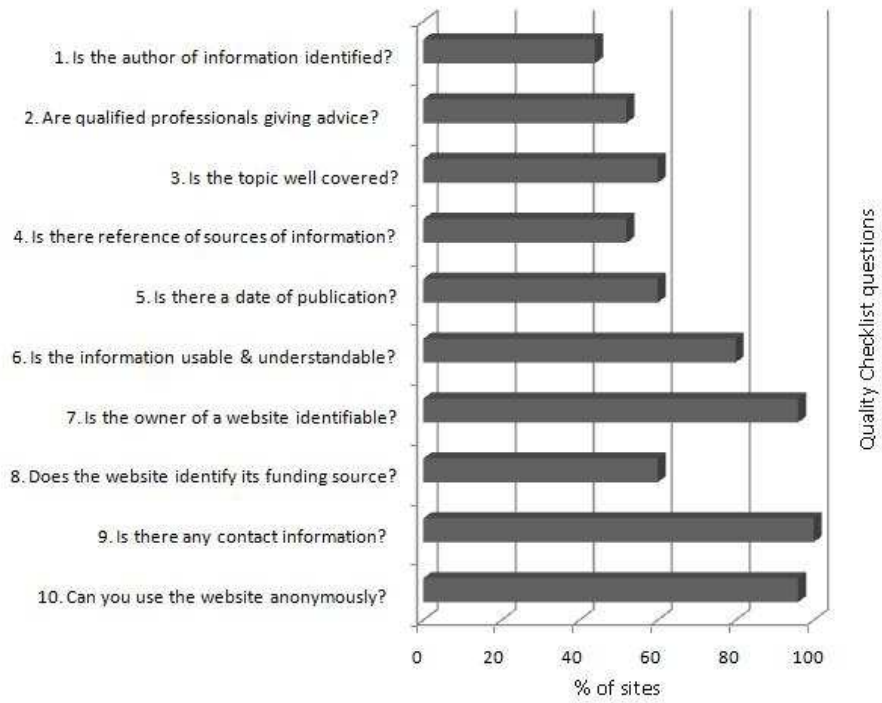

Combined scores of the Quality Checklist questions (percentage of option 'yes')  
56x41mm (300 x 300 DPI)

ew only



To view the full contents of this document, you need a later version of the PDF viewer. You can upgrade to the latest version of Adobe Reader from [www.adobe.com/products/acrobat/readstep2.html](http://www.adobe.com/products/acrobat/readstep2.html)

For further support, go to [www.adobe.com/support/products/acrreader.html](http://www.adobe.com/support/products/acrreader.html)
